# Supplementary material for: Body mass index, abdominal fatness, fat mass and the risk of atrial fibrillation: a systematic review and dose–response meta-analysis of prospective studies
Source: PubMed Central journal article supplement (PMC5380695; doi:10.1007/s10654-017-0232-4), 2017-02-13
Supplement: 10654_2017_232_MOESM1_ESM.pdf [file 10654_2017_232_MOESM1_ESM.pdf]

## SUPPLEMENTAL MATERIAL

Aune D, Sen A, Schlesinger S, Norat T, Janszky I, Romundstad P, Tonstad S, Riboli E, Vatten LJ. Body mass index, abdominal fatness, fat mass and the risk of atrial fibrillation: a systematic review and dose-response meta-analysis of prospective studies: *Eur J Epidemiol* 2017; DOI: [10.1007/s10654-017-0232-4](https://doi.org/10.1007/s10654-017-0232-4)

Supplementary Table 1. PubMed search

|    |                                                                                  |
|----|----------------------------------------------------------------------------------|
| 1  | “body mass index”                                                                |
| 2  | BMI                                                                              |
| 3  | overweight                                                                       |
| 4  | obesity                                                                          |
| 5  | anthropometry                                                                    |
| 6  | fatness                                                                          |
| 7  | “body fatness”                                                                   |
| 8  | “abdominal fatness”                                                              |
| 9  | “abdominal obesity”                                                              |
| 10 | “waist circumference”                                                            |
| 11 | “waist-to-hip ratio”                                                             |
| 12 | adiposity                                                                        |
| 13 | “weight gain”                                                                    |
| 14 | “weight change”                                                                  |
| 15 | “weight loss”                                                                    |
| 16 | “atrial fibrillation”                                                            |
| 17 | “atrial flutter”                                                                 |
| 18 | 1 OR 2 OR 3 OR 4 OR 5 OR 6 OR 7 OR 8 OR 9 OR 10 OR 11 OR 12 OR 13<br>OR 14 OR 15 |
| 19 | 16 OR 17                                                                         |
| 20 | 18 AND 19                                                                        |

Supplementary Table 2. Embase search

|    |                      |
|----|----------------------|
| 1  | body mass index/     |
| 2  | BMI/                 |
| 3  | overweight/          |
| 4  | obesity/             |
| 5  | anthropometry/       |
| 6  | fatness/             |
| 7  | body fatness/        |
| 8  | abdominal fatness/   |
| 9  | abdominal obesity/   |
| 10 | waist circumference/ |
| 11 | waist-to-hip ratio/  |
| 12 | adiposity/           |
| 13 | weight gain/         |
| 14 | weight change/       |
| 15 | weight loss/         |
| 16 | atrial fibrillation/ |
| 17 | atrial flutter/      |
| 18 | case-control         |
| 19 | cohort               |
| 20 | cohorts              |
| 21 | prospective          |
| 22 | longitudinal         |
| 23 | retrospective        |

|    |                                                                                                       |
|----|-------------------------------------------------------------------------------------------------------|
| 24 | follow-up                                                                                             |
| 25 | cross-sectional                                                                                       |
| 26 | hazard ratio                                                                                          |
| 27 | hazard ratios                                                                                         |
| 28 | relative risk                                                                                         |
| 29 | relative risks                                                                                        |
| 30 | incidence rate ratio                                                                                  |
| 31 | incidence rate ratios                                                                                 |
| 32 | odds ratio                                                                                            |
| 33 | odds ratios                                                                                           |
| 34 | incidence                                                                                             |
| 35 | 1 OR 2 OR 3 OR 4 OR 5 OR 6 OR 7 OR 8 OR 9 OR 10 OR 11 OR 12 OR 13<br>OR 14 OR 15                      |
| 36 | 16 OR 17                                                                                              |
| 37 | 18 OR 19 OR 20 OR 21 OR 22 OR 23 OR 24 OR 25 OR 26 OR 27 OR 28 OR<br>29 OR 30 OR 31 OR 32 OR 33 OR 34 |
| 38 | 35 AND 36 AND 37                                                                                      |

Supplementary Table 3. List of excluded studies and reasons for exclusion.

| Exclusion reason                            | Reference number |
|---------------------------------------------|------------------|
| Abstract                                    | (1-40)           |
| Case-control study                          | (41-49)          |
| Cross-sectional study                       | (50-71)          |
| Duplicates                                  | (72-81)          |
| High risk patients                          | (82)             |
| Letter, News, comments, editorial           | (83-104)         |
| Meta-analysis                               | (105-107)        |
| No risk estimates                           | (108)            |
| Non-English                                 | (109)            |
| Not relevant data                           | (110-123)        |
| Patient population, progression, recurrence | (124-222)        |
| Review                                      | (223-260)        |
| <3 categories of exposure                   | (261-267)        |

#### Reference List

1. Djousse L. Association of modifiable lifestyle factors and risk of total and cardiovascular mortality among older us male physicians. *Cardiology (Switzerland)* Conference: International Academy of Cardiology 1920;July.
2. Alonso A, Lopez FL, Mac Lehosé RF. Additive and multiplicative interactions of race with risk factors for atrial fibrillation: The Aric study. *American Journal of Epidemiology* Conference: 3rd North American Congress of Epidemiology Montreal, QC Canada Conference Start: 2011;01.

3. Grundvold I, Skretteberg PT, Kjeldsen SE, Arnesen H, Bodegard J. Physical fitness modifies the predictive impact of weight gain and body mass index for incident atrial fibrillation. *Circulation Conference: American Heart Association's Scientific Sessions* 2011;22.
4. Conen D, Glynn RJ, Sandhu RK, Tedrow UB, Albert CM. Differing risk factors for incident atrial fibrillation with and without left atrial enlargement. *Circulation Conference: American Heart Association's Scientific Sessions* 2011;22.
5. Kokubo Y, Shimizu W, Kamakura S et al. Obesity index and the risk of atrial fibrillation in an Urban Japanese cohort: The Suita study. *Circulation Conference: American Heart Association's Scientific Sessions* 2011;22.
6. Gruberg L, Parikh B, Malhotra A, Kort S. Impact of body mass index and gender on left atrial size and the presence of atrial fibrillation. *Circulation Conference: American Heart Association's Scientific Sessions* 2011;22.
7. Peng F, Lin J, Liu H. Metabolic syndrome and risk of atrial fibrillation in Chinese essential hypertensive patients. *International Journal of Cardiology Conference: World Hypertension League Regional Congress* 2011;October.
8. Sandhu RK, Conen D, Tedrow UB, Fitzgerald K, Glynn R, Albert CM. Risk factors associated with development of paroxysmal versus persistent atrial fibrillation. *Circulation Conference: American Heart Association* 2012;20.
9. Jensen PN, Thacker EL, Dublin S, Psaty BM, Heckbert SR. Racial differences in the incidence of and risk factors for atrial fibrillation in older adults: The cardiovascular health study. *Circulation Conference: Epidemiology and Prevention/Physical Activity, Nutrition and Metabolism* 2012;13.
10. Karasoy D, Gislason G, Torp-Pedersen C et al. Obesity is a powerful predictor of atrial fibrillation in fertile women. *European Heart Journal Conference: ESC Congress* 2012;August.
11. Kokubo Y, Shimizu W, Watanabe M et al. Impact of blood pressure and obesity on the risk of incident atrial fibrillation in the Suita Study: An urban cohort study. *European Heart Journal Conference: ESC Congress* 2012;August.
12. Sandhu R, Conen D, Tedrow UB, Glynn RJ, Albert CM. Risk factors associated with paroxysmal versus persistent/permanent atrial fibrillation. *European Heart Journal Conference: ESC Congress* 2012;August.
13. Karas MG, Yee L, Biggs ML et al. Central and general adiposity and risk of incident atrial fibrillation in older adults: The cardiovascular health study. *Journal of the American College of Cardiology Conference: 61th Annual Scientific Session of the American College of Cardiology and i2 Summit: Innovation in Intervention, ACC 12 Chicago, IL United States Conference Start:* 2012;27.
14. Willis BL, De FL, Radford N, Gao A, Leonard D, Berry J. Association of cardiorespiratory fitness and body mass index in midlife with atrial fibrillation in later life: The cooper center longitudinal study. *Circulation Conference: American Heart Association* 2013;26.

15. Schmidt M, Botker HE, Pedersen L, Sorensen HT. Obesity in young men and long-term risk of atrial fibrillation: 33-year follow-up of 12,850 young healthy men. *Circulation Conference: American Heart Association* 2013;26.
16. Neeland IJ, Turer A, Ayers C et al. Body fat distribution and incident cardiovascular disease in obese adults. *Circulation Conference: American Heart Association* 2013;26.
17. Pignatelli P, Pastori D, Cangemi R et al. Metabolic syndrome is an independent predictor of cardiovascular events in patients with atrial fibrillation. *Circulation Conference: American Heart Association* 2013;26.
18. Onuchina E, Solovyev O, Mochalova O, Onuchin S, Onuchina J. Risk factors of atrial fibrillation in patients with metabolic syndrome. *Journal of Diabetes Conference: 5th International Congress on Prediabetes and the Metabolic Syndrome Early Interventions for Diabetes and Dysglycaemia Surgery in the Treatment of Obesity and Diabetes Vienna Austria Conference Start: 2013;April.*
19. Grundvold I, Skretteberg PT, Liestoel K et al. Predictors of atrial fibrillation differ in men with high vs low physical fitness. *European Heart Journal Conference: European Society of Cardiology, ESC Congress* 2013;August.
20. Mahabadi AA, Lehmann N, Kalsch H et al. Epicardial adipose tissue and left atrial size as CT-derived predictors of atrial fibrillation: The heinz nixdorf recall study. *European Heart Journal Conference: European Society of Cardiology, ESC Congress* 2013;August.
21. Jamaly S, Jacobson P, Peltonen M, Carlsson L, Sjostrom L, Karason K. Obesity surgery and incidence of atrial fibrillation. *European Heart Journal Conference: European Society of Cardiology, ESC Congress* 2013;August.
22. Kelsey AM. Atrial fibrillation in postmenopausal women: Risk factors, diagnosis, and management. *Menopause Conference: 25th Annual Meeting of the North American Menopause Society, NAMS* 2014;December.
23. Kokubo Y, Kobayashi T, Watanbe M et al. A combination of metabolic syndrome components increased the risk of incident atrial fibrillation in a general urban cohort: The Suita study. *Hypertension Conference: American Heart Association's High Blood Pressure Research* 2014;November.
24. Vermond RA, Geelhoed B, Verweij N et al. Incidence of atrial fibrillation and relation with cardiovascular events, heart failure and mortality in a european community-based study-data of prevend. *Circulation Conference: American Heart Association's* 2014;25.
25. Berkovitch A, Kivity S, Klempfner R et al. Weight reduction is associated with reduced risk for atrial fibrillation in apparently healthy middle-age men and women. *European Heart Journal Conference: European Society of Cardiology, ESC Congress* 2014;01.
26. Grundvold I, Bodegard J, Nilsson PM et al. Body mass index and changes in weight are associated with risk of atrial fibrillation and cardiovascular mortality: A longitudinal cohort study of 7,169 patients with newly diagnosed type 2 diabetes.

European Heart Journal Conference: European Society of Cardiology, ESC Congress 2014;01.

27. Kokubo Y, Kobayashi T, Watanabe M et al. Combination of type 2 diabetes and overweight is linked to an increased incidence of atrial fibrillation in a general urban cohort population. European Heart Journal Conference: European Society of Cardiology, ESC Congress 2014;01.
28. Bulbulia R, Sherliker P, Clack R, Halliday A, Peto R, Lewington S. Adiposity, systolic blood pressure, smoking and atrial fibrillation: Analyses of 2.3 million us adults attending cardiovascular screening. Circulation Conference: American Heart Association's 2015;10.
29. Kokubo Y, Watanabe M, Higashiyama A et al. A risk score for the prediction of atrial fibrillation in the Japanese community: The Suita study. Circulation Conference: American Heart Association's 2015;10.
30. Nilsson PM, Zoller B, Sundquist J, Sundquist K. Predictors of severe obesity and associated morbidity in the Malmo Preventive Project: A population-based cohort study. Diabetologia Conference: 51st Annual Meeting of the European Association for the Study of Diabetes, EASD 2015;September.
31. Andersen K, Rasmussen F, Neovius M, Tynelius P, Sundstrom J. Anthropometric measures and risk of atrial fibrillation-a cohort study of 1.2 million young men. European Heart Journal Conference: European Society of Cardiology, ESC Congress 2015;01.
32. Nakamura S, Adachi H, Enomoto M et al. The trend of atrial fibrillation in the elderly men for 30 years in a japanese general population. Journal of Hypertension Conference: 25th European Meeting on Hypertension and Cardiovascular Protection, ESH 2015;June.
33. Aronis KN, Wang N, Phillips C et al. Associations of adiposity and atrial fibrillation in older adults: The health abc study. Circulation Conference: American Heart Association's Epidemiology and Prevention/Lifestyle and Cardiometabolic Health 2015;10.
34. Shulman EH, Kargoli F, Hoch E et al. Body mass index and the development of atrial fibrillation in hispanics, blacks and non-hispanic whites. Journal of the American College of Cardiology Conference: 65th Annual Scientific Session of the American College of Cardiology and i2 Summit: Innovation in Intervention, ACC 16 Chicago, IL United States Conference Start: 2016;05.
35. Baek Y, Yang P-S, Kim T-H et al. Associations of abdominal obesity and new onset atrial fibrillation in general population: A nationwide cohort study in Korea. Journal of the American College of Cardiology Conference: 65th Annual Scientific Session of the American College of Cardiology and i2 Summit: Innovation in Intervention, ACC 16 Chicago, IL United States Conference Start: 2016;05.
36. Heckbert SR, Wiggins KL, Blackshear C et al. Pericardial fat volume is associated with incident atrial fibrillation: The multi-ethnic study of atherosclerosis and the



jackson heart study. Circulation Conference: American Heart Association's Epidemiology and Prevention/Lifestyle and Cardiometabolic Health 2016;01.

37. Anderson JL, Knight S, May HT, Bunch TJ, Lappe DL, Muhlestein JB. Prevalence of atrial fibrillation (AF) risk factors and lone AF in a general healthcare population. Circulation Conference: American Heart Association 2012;20.
38. Wong CX, Sun MT, Mahajan R et al. Obesity and the risk of atrial fibrillation: A systematic review and meta-analysis. Circulation Conference: American Heart Association 2012;20.
39. Murakami C, Nagai T, Akira F et al. Total epicardial fat volume is associated with early recurrence of atrial fibrillation after catheter ablation. Journal of the American College of Cardiology Conference: 61th Annual Scientific Session of the American College of Cardiology and i2 Summit: Innovation in Intervention, ACC 12 Chicago, IL United States Conference Start: 2012;27.
40. White T, Cameron J, Mottram P. Weight confirmed as a risk factor for atrial fibrillation in 39,023 subjects. Heart Lung and Circulation Conference: Cardiac Society of Australia and New Zealand Annual Scientific Meeting and the International Society for Heart Research Australasian Section Annual Scientific Meeting 2015;2015.
41. Wong CX, Abed HS, Molaee P et al. Pericardial fat is associated with atrial fibrillation severity and ablation outcome. J Am Coll Cardiol 2011;57:1745-51.
42. Dublin S, French B, Glazer NL et al. Risk of new-onset atrial fibrillation in relation to body mass index. Arch Intern Med 2006;166:2322-8.
43. Al Chekakie MO, Welles CC, Metoyer R et al. Pericardial fat is independently associated with human atrial fibrillation. J Am Coll Cardiol 2010;56:784-8.
44. Batal O, Schoenhagen P, Shao M et al. Left atrial epicardial adiposity and atrial fibrillation. Circ Arrhythm Electrophysiol 2010;3:230-6.
45. Tsao H-M, Hu W-C, Wu M-H, Chen S-A. Abundance and distribution of epicardial adipose tissue surrounding the left atrium in patients with atrial fibrillation. Heart Rhythm Conference: 31st Annual Scientific Sessions of the Heart Rhythm Society, Heart Rhythm 2010;May.
46. Calvo N, Ramos P, Montserrat S et al. Emerging risk factors and the dose-response relationship between physical activity and lone atrial fibrillation: a prospective case-control study. Europace 2015.
47. Abed HS, Wong CX, Brooks AG et al. Periatrial fat volume is predictive of atrial fibrillation severity. Heart Rhythm Conference: 31st Annual Scientific Sessions of the Heart Rhythm Society, Heart Rhythm 2010;May.
48. Al Chekakie MON, Welles CC, Metoyer R et al. Pericardial fat is independently associated with human atrial fibrillation. Heart Rhythm Conference: 31st Annual Scientific Sessions of the Heart Rhythm Society, Heart Rhythm 2010;May.

49. Abed H, Wong C, Brooks A et al. Periatrial fat volume is predictive of atrial fibrillation severity. Heart Lung and Circulation Conference: New Zealand Annual Scientific Meeting of the Cardiac Society of Australia and New Zealand Adelaide, SA Australia Conference Start: 2010;2010.
50. Umetani K, Kodama Y, Nakamura T et al. High prevalence of paroxysmal atrial fibrillation and/or atrial flutter in metabolic syndrome. *Circ J* 2007;71:252-5.
51. Schnabel RB, Wilde S, Wild PS, Munzel T, Blankenberg S. Atrial fibrillation: its prevalence and risk factor profile in the German general population. *Dtsch Arztebl Int* 2012;109:293-9.
52. Lipworth L, Okafor H, Mumma MT et al. Race-specific impact of atrial fibrillation risk factors in blacks and whites in the southern community cohort study. *American Journal of Cardiology* 110 (11) (pp 1637-1642), 2012;01.
53. Schnabel RB, Johannsen SS, Wild PS, Blankenberg S. [Prevalence and risk factors of atrial fibrillation in Germany : data from the Gutenberg Health Study]. *Herz* 2015;40:8-15.
54. Martin-Rodriguez E, Guillen-Grima F, Marti A, Brugos-Larumbe A. Comorbidity associated with obesity in a large population: The APNA study. *Obesity Research and Clinical Practice* 9 (5) (pp 435-447), 2015;September.
55. Sun G, Guo L, Wang X et al. Prevalence of atrial fibrillation and its risk factors in rural China: A cross-sectional study. *Journal of the American College of Cardiology Conference: 26th Great Wall International Congress of Cardiology, Asia Pacific Heart Congress* 2015;20.
56. Guize L, Thomas F, Bean K, Benetos A, Pannier B. [Atrial fibrillation: prevalence, risk factors and mortality in a large French population with 15 years of follow-up]. *Bull Acad Natl Med* 2007;191:791-803.
57. Yap KB, Ng TP, Ong HY. Low prevalence of atrial fibrillation in community-dwelling Chinese aged 55 years or older in Singapore: a population-based study. *Journal of Electrocardiology* 41 (2) (pp 94-98), 2008;March.
58. Zhang X, Zhang S, Li Y et al. Association of obesity and atrial fibrillation among middle-aged and elderly Chinese. *Int J Obes (Lond)* 2009;33:1318-25.
59. Bonhorst D, Mendes M, Adragao P et al. Prevalence of atrial fibrillation in the Portuguese population aged 40 and over: the FAMA study. *Rev Port Cardiol* 2010;29:331-50.
60. Thanassoulis G, Massaro JM, O'Donnell CJ et al. Pericardial fat is associated with prevalent atrial fibrillation: the Framingham Heart Study. *Circ Arrhythm Electrophysiol* 2010;3:345-50.
61. Gill PS, Calvert M, Davis R, Davies MK, Freemantle N, Lip GY. Prevalence of heart failure and atrial fibrillation in minority ethnic subjects: the Ethnic-Echocardiographic Heart of England Screening Study (E-ECHOES). *PLoS One* 2011;6:e26710.

62. Long MJ, Jiang CQ, Lam TH et al. Atrial fibrillation and obesity among older Chinese: the Guangzhou Biobank Cohort Study. *Int J Cardiol* 2011;148:48-52.
63. Wetmore JB, Mahnken JD, Rigler SK et al. The prevalence of and factors associated with chronic atrial fibrillation in Medicare/Medicaid-eligible dialysis patients. *Kidney Int* 2012;81:469-76.
64. Schnabel RB, Wilde S, Wild PS, Munzel T, Blankenberg S. Atrial fibrillation: Its prevalence and risk factor profile in the German general population. *Deutsches Arzteblatt International* 109 (16) (pp 293-299), 2012;20.
65. Li Y, Wu YF, Chen KP et al. Prevalence of atrial fibrillation in China and its risk factors. *Biomed Environ Sci* 2013;26:709-16.
66. Hwan-Cheol P, Soon-Gil K, Kyoung KM, Bo YC, Jinho S. Prevalence of atrial fibrillation in asymptomatic healthy population in Korean rural area. *Journal of Clinical Hypertension Conference: 28th Annual Scientific Meeting and Exposition of the American Society of Hypertension, Inc , ASH* 2013;May.
67. Baena-Diez JM, Grau M, Fores R et al. Prevalence of atrial fibrillation and its associated factors in Spain: An analysis of 6 population-based studies. *DARIOS Study. Rev Clin Esp* 2014;214:505-12.
68. Chei CL, Raman P, Ching CK et al. Prevalence and Risk Factors of Atrial Fibrillation in Chinese Elderly: Results from the Chinese Longitudinal Healthy Longevity Survey. *Chin Med J (Engl )* 2015;128:2426-32.
69. Park HC, Park JK, Choi SI et al. Prevalence of Atrial Fibrillation and Relation to Echocardiographic Parameters in a Healthy Asymptomatic Rural Korean Population. *J Korean Med Sci* 2015;30:1078-84.
70. Sun GZ, Guo L, Wang XZ et al. Prevalence of atrial fibrillation and its risk factors in rural China: a cross-sectional study. *Int J Cardiol* 2015;182:13-7.
71. Svetlana Shalnova SA, Deev AD, Konstantinov VV. Prevalence of atrial fibrillation and its association with traditional risk factors and coronary heart disease in Russian population. *European Journal of Preventive Cardiology Conference: EuroPREvent* 2013;April.
72. Frost L, Hune LJ, Vestergaard P. [Overweight, obesity and risk factors for atrial fibrillation or flutter--secondary publication. The cohort study Diet, Cancer and Health]. *Ugeskr Laeger* 2005;167:3507-9.
73. Rodriguez F, Stefanick ML, Greenland P et al. Racial and ethnic differences in atrial fibrillation risk factors and predictors in women: Findings from the Women's Health Initiative. *Am Heart J* 2016;176:70-7.
74. Huxley RR, Lopez FL, Folsom AR et al. Absolute and attributable risks of atrial fibrillation in relation to optimal and borderline risk factors: the Atherosclerosis Risk in Communities (ARIC) study. *Circulation* 2011;123:1501-8.

75. Schnabel RB, Sullivan LM, Levy D et al. Development of a risk score for atrial fibrillation (Framingham Heart Study): a community-based cohort study. *Lancet* 2009;373:739-45.
76. Son MK, Lim NK, Cho MC, Park HY. Incidence and Risk Factors for Atrial Fibrillation in Korea: the National Health Insurance Service Database (2002-2010). *Korean Circ J* 2016;46:515-21.
77. Perez MV, Wang PJ, Larson JC et al. Risk factors for atrial fibrillation and their population burden in postmenopausal women: the Women's Health Initiative Observational Study. *Heart* 2013;99:1173-8.
78. Ermakov S, Azarbal F, Stefanick ML et al. The associations of leptin, adiponectin and resistin with incident atrial fibrillation in women. *Heart* 2016.
79. Tedrow UB, Conen D, Ridker PM et al. The long- and short-term impact of elevated body mass index on the risk of new atrial fibrillation the WHS (women's health study). *J Am Coll Cardiol* 2010;55:2319-27.
80. Ruigomez A, Johansson S, Wallander MA, Rodriguez LA. Incidence of chronic atrial fibrillation in general practice and its treatment pattern. *J Clin Epidemiol* 2002;55:358-63.
81. Toren K, Schioler L, Soderberg M, Giang KW, Rosengren A. The association between job strain and atrial fibrillation in Swedish men. *Occup Environ Med* 2015;72:177-80.
82. Casaclang-Verzosa G, Barnes ME, Blume G et al. C-reactive protein, left atrial volume, and atrial fibrillation: a prospective study in high-risk elderly. *Echocardiography* 2010;27:394-9.
83. Osorio J. Atrial fibrillation: Obesity increases risk of AF in women. *Nat Rev Cardiol* 2010;7:417.
84. Dages N, nastasiou-Nana M. Atrial fibrillation and obesity an association of increasing importance. *J Am Coll Cardiol* 2010;55:2328-9.
85. Conen D. Obesity and atrial fibrillation: the evidence is gaining weight. *Europace* 2013;15:771-2.
86. Chahal CAA, Somers VK. Risk factors: Sleep apnoea, atrial fibrillation, and heart failure - Quo vadis? *Nature Reviews Cardiology* 12 (5) (pp 263-264), 2015;28.
87. Ergun G, Basaran O, Dogan V, Dogan MM, Biteker M. Obesity and atrial fibrillation. *Int J Cardiol* 2016;223:159-60.
88. Coromilas J. Obesity and atrial fibrillation: is one epidemic feeding the other? *JAMA* 2004;292:2519-20.
89. Liew R. Obstructive sleep apnea, obesity, and atrial fibrillation--what is the mechanistic link? *Heart Rhythm* 2012;9:1417-8.

90. Hatem SN. Atrial Fibrillation and Obesity: Not Just a Coincidence. *J Am Coll Cardiol* 2015;66:12-3.
91. Korantzopoulos P, Kolettis TM. Obesity and the risk of new-onset atrial fibrillation. *JAMA* 2005;293:1974.
92. Parish D. Obesity and the risk of new-onset atrial fibrillation. *JAMA* 2005;293:1974.
93. Bajaj HS, Hillson SD. Obesity and the risk of new-onset atrial fibrillation. *JAMA* 2005;293:1974-5.
94. Obesity is a risk factor for new-onset atrial fibrillation. *Geriatrics and Aging* 8 (2) (pp 9), 2005;February.
95. Mascitelli L, Pezzetta F. Obesity, inflammation, and risk of atrial fibrillation or flutter. *Am J Med* 2006;119:e9.
96. Arias MA, Sanchez-Gila J. Obesity as a risk factor for developing postoperative atrial fibrillation. *Chest* 2006;129:828-9.
97. Cheng TO. Obesity as a risk factor for atrial fibrillation. *Int J Cardiol* 2007;114:145.
98. Arias MA, Sanchez AM, onso-Fernandez A, Garcia-Rio F. Atrial fibrillation, obesity, and obstructive sleep apnea [3]. *Archives of Internal Medicine* 167 (14) (pp 1552-1553), 2007;23.
99. Badheka AO, Rathod A, Bharadwaj A, Afonso L, Jacob S. Obesity paradox in outcomes of atrial fibrillation. *American Journal of Cardiology* 108 (3) (pp 474), 2011;01.
100. Deshmukh A, Pant S, Kumar G, Badheka AO, Paydak H. Impact of obesity on atrial fibrillation hospitalization. *Int J Cardiol* 2012;159:241-2.
101. Dhein S. Fat and the Heart: A More and More Complex Interplay. *Thoracic and Cardiovascular Surgeon* 62 (7) (pp 543-546), 2014;25.
102. Liu F, Li Y, Xu Y. Weight loss to prevent atrial fibrillation: The role of epicardial adipose tissue. *Int J Cardiol* 2016;204:124-5.
103. Amar D. Obesity as a risk factor for developing postoperative atrial fibrillation [6]. *Chest* 129 (3) (pp 828-829), 2006;March.
104. Girerd N, Pibarot P, Mathieu P. Predictors of atrial fibrillation following coronary artery bypass surgery: Increased waist circumference rather than increased body mass index? *Medical Science Monitor* 17 (3) (pp 23), 2011;2011.
105. Wanahita N, Messerli FH, Bangalore S, Gami AS, Somers VK, Steinberg JS. Atrial fibrillation and obesity--results of a meta-analysis. *Am Heart J* 2008;155:310-5.
106. Wong CX, Sullivan T, Sun MT et al. Obesity and the risk of incident, post-operative, and post-ablation atrial fibrillation: A meta-analysis of 626,603 individuals in 51 studies. *JACC: Clinical Electrophysiology* 1 (3) (pp 139-152), 2015;June.

107. Wong C, Brooks A, Sun M et al. Obesity and the risk of atrial fibrillation: A systematic review and meta-analysis. Heart Lung and Circulation Conference: Cardiac Society of Australia and New Zealand Annual Scientific Meeting and the International Society for Heart Research Australasian Section Annual Scientific Meeting 2012;2012.
108. Uyarel H, Onat A, Yuksel H, Can G, Ordu S, Dursunoglu D. Incidence, prevalence, and mortality estimates for chronic atrial fibrillation in Turkish adults. [Turkish]. Turk Kardiyoloji Dernegi Arsivi 36 (4) (pp 214-222), 2008;June.
109. Shi JH, Ji CP, Xing AJ et al. [Impact of combined systolic blood pressure and body mass index on the risk of new-onset atrial fibrillation]. Zhonghua Xin Xue Guan Bing Za Zhi 2016;44:231-7.
110. Kang S. Research in brief. The Lancet Diabetes and Endocrinology 4 (7) (pp 565), 2016;01.
111. Sliwa K, Carrington MJ, Klug E et al. Predisposing factors and incidence of newly diagnosed atrial fibrillation in an urban African community: Insights from the Heart of Soweto Study. Heart 96 (23) (pp 1878-1882), 2010;December.
112. Djousse L, Wilk JB, Hanson NQ, Glynn RJ, Tsai MY, Gaziano JM. Association Between Adiponectin and Heart Failure Risk in the Physicians' Health Study. Obesity (no pagination), 2012;15.
113. Petrone AB, Gaziano JM, Djousse L. Chocolate consumption and risk of heart failure in the Physicians' Health Study. European Journal of Heart Failure 16 (12) (pp 1372-1376), 2014;01.
114. Perkiomaki J, Ukkola O, Kiviniemi A et al. Heart rate variability findings as a predictor of atrial fibrillation in middle-aged population. Journal of Cardiovascular Electrophysiology 25 (7) (pp 719-724), 2014;July.
115. Blomstrand A, Blomstrand C, Ariai N, Bengtsson C, Bjorkelund C. Stroke incidence and association with risk factors in women: A 32-year follow-up of the Prospective Population Study of Women in Gothenburg. BMJ Open 4 (10) (no pagination), 2014;e005173.
116. Huynh K. Atrial fibrillation. Weight loss reduces AF burden. Nat Rev Cardiol 2015;12:260.
117. Rodriguez CJ, Soliman EZ, Alonso A et al. Atrial fibrillation incidence and risk factors in relation to race-ethnicity and the population attributable fraction of atrial fibrillation risk factors: The Multi-Ethnic Study of Atherosclerosis. Annals of Epidemiology 25 (2) (pp 71-76), 2015;01.
118. Macheret F, Bartz TM, Djousse L et al. Higher circulating adiponectin levels are associated with increased risk of atrial fibrillation in older adults. Heart 101 (17) (pp 1368-1374), 2015;01.

119. Tiwari S, Schirmer H, Jacobsen BK et al. Association between diastolic dysfunction and future atrial fibrillation in the Tromso Study from 1994 to 2010. *Heart* 101 (16) (pp 1302-1308), 2015;01.
120. Qureshi WT, Alirhayim Z, Blaha MJ et al. Cardiorespiratory fitness and risk of incident atrial fibrillation results from the Henry Ford Exercise Testing (FIT) project. *Circulation* 131 (21) (pp 1827-1834), 2015;26.
121. Pandit SV, Anumonwo J, Jalife J. Atrial Fibrillation Susceptibility in Obesity: An Excess Adiposity and Fibrosis Complicity? *Circ Res* 2016;118:1468-71.
122. Schmidt M, Ulrichsen SP, Pedersen L, Botker HE, Nielsen JC, Sorensen HT. 30-year nationwide trends in incidence of atrial fibrillation in Denmark and associated 5-year risk of heart failure, stroke, and death. *International Journal of Cardiology* 225 (pp 30-36), 2016;15.
123. Cui F, Zhang L, Yu C, Hu S, Zhang Y. Estimation of the disease burden attributable to 11 risk factors in Hubei Province, China: A comparative risk assessment. *International Journal of Environmental Research and Public Health* 13 (10) (no pagination), 2016;944.
124. Wong YW, Thomas L, Sun J-L et al. Predictors of incident heart failure hospitalizations among patients with impaired glucose tolerance insight from the nateglinide and valsartan in impaired glucose tolerance outcomes research study. *Circulation: Heart Failure* 6 (2) (pp 203;March).
125. Zacharias A, Schwann TA, Riordan CJ, Durham SJ, Shah AS, Habib RH. Obesity and risk of new-onset atrial fibrillation after cardiac surgery. *Circulation* 2005;112:3247-55.
126. Arias MA, Sanchez AM, Sanchez-Gila J. Postoperative atrial fibrillation and obesity. *Am J Cardiol* 2006;97:1551-2.
127. Echahidi N, Mohty D, Pibarot P et al. Obesity and metabolic syndrome are independent risk factors for atrial fibrillation after coronary artery bypass graft surgery. *Circulation* 2007;116:I213-I219.
128. Novo G, Mansueto P, La Franca ML et al. Risk factors, atrial fibrillation and thromboembolic events. *Int Angiol* 2008;27:433-8.
129. Jongnarangsin K, Chugh A, Good E et al. Body mass index, obstructive sleep apnea, and outcomes of catheter ablation of atrial fibrillation. *J Cardiovasc Electrophysiol* 2008;19:668-72.
130. Mont L, Tamborero D, Elosua R et al. Physical activity, height, and left atrial size are independent risk factors for lone atrial fibrillation in middle-aged healthy individuals. *Europace* 2008;10:15-20.
131. Tang RB, Liu XH, Kalifa J et al. Body mass index and risk of left atrial thrombus in patients with atrial fibrillation. *Am J Cardiol* 2009;104:1699-703.

132. Nicolaou VN, Papadakis JE, Dermitzakis G, Dermitzaki SI, Tsakiris AK. Effect of obesity on atrial size in older women with non-valvular paroxysmal atrial fibrillation. *Aging Clin Exp Res* 2009;21:344-8.
133. Tang RB, Gao LY, Dong JZ et al. Metabolic syndrome in patients with atrial fibrillation in the absence of structural heart disease from a tertiary hospital in China. *Chin Med J (Engl )* 2009;122:2744-7.
134. Girerd N, Pibarot P, Fournier D et al. Middle-aged men with increased waist circumference and elevated C-reactive protein level are at higher risk for postoperative atrial fibrillation following coronary artery bypass grafting surgery. *Eur Heart J* 2009;30:1270-8.
135. Filardo G, Hamilton C, Hamman B, Hebel RF, Jr., Grayburn PA. Relation of obesity to atrial fibrillation after isolated coronary artery bypass grafting. *Am J Cardiol* 2009;103:663-6.
136. Soliman EZ, Prineas RJ, Go AS et al. Chronic kidney disease and prevalent atrial fibrillation: the Chronic Renal Insufficiency Cohort (CRIC). *Am Heart J* 2010;159:1102-7.
137. Uchiyama S, Shibata Y, Hirabayashi T et al. Risk factor profiles of stroke, myocardial infarction, and atrial fibrillation: a Japanese Multicenter Cooperative Registry. *J Stroke Cerebrovasc Dis* 2010;19:190-7.
138. Chilukuri K, Dalal D, Gadrey S et al. A prospective study evaluating the role of obesity and obstructive sleep apnea for outcomes after catheter ablation of atrial fibrillation. *J Cardiovasc Electrophysiol* 2010;21:521-5.
139. Suzuki S, Yamashita T, Ohtsuka T et al. Body size and atrial fibrillation in Japanese outpatients. *Circ J* 2010;74:66-70.
140. Ahmed I, Almquist AK, Henry TD et al. Obesity and pulmonary hypertension are independent risk factors for postoperative paroxysmal atrial fibrillation after heart valve replacement surgery. *Heart Rhythm Conference: 31st Annual Scientific Sessions of the Heart Rhythm Society, Heart Rhythm* 2010;May.
141. Onuchina EL, Solov'ev OV, Mochalova OV, Kononov SK, Onuchin SG. [Metabolic syndrome and chronic persistent atrial fibrillation]. *Klin Med (Mosk)* 2011;89:26-31.
142. Bramer S, van Straten AH, Soliman Hamad MA, Berreklouw E, van den Broek KC, Maessen JG. Body mass index predicts new-onset atrial fibrillation after cardiac surgery. *Eur J Cardiothorac Surg* 2011;40:1185-90.
143. Guglin M, Maradia K, Chen R, Curtis AB. Relation of obesity to recurrence rate and burden of atrial fibrillation. *Am J Cardiol* 2011;107:579-82.
144. Thacker EL, McKnight B, Psaty BM et al. Association of body mass index, diabetes, hypertension, and blood pressure levels with risk of permanent atrial fibrillation. *J Gen Intern Med* 2013;28:247-53.



145. Cai L, Yin Y, Ling Z et al. Predictors of late recurrence of atrial fibrillation after catheter ablation. *Int J Cardiol* 2013;164:82-7.
146. Letsas KP, Siklody CH, Korantzopoulos P et al. The impact of body mass index on the efficacy and safety of catheter ablation of atrial fibrillation. *Int J Cardiol* 2013;164:94-8.
147. Zethelius B, Gudbjornsdottir S, Eliasson B, Eeg-Olofsson K, Svensson A-M, Cederholm J. Risk factors for atrial fibrillation in type 2 diabetes. Report from the Swedish National Diabetes Register: NDR. *Diabetologia Conference: 50th Annual Meeting of the European Association for the Study of Diabetes, EASD* 2014;September.
148. Abed HS, Nelson AJ, Richardson JD et al. Impact of weight reduction on pericardial adipose tissue and cardiac structure in patients with atrial fibrillation. *American Heart Journal* 169 (5) (pp 655-662 e2), 2015;01.
149. Guenancia C, Stamboul K, Garnier F et al. Obesity and new-onset atrial fibrillation in acute myocardial infarction: A gender specific risk factor. *Archives of Cardiovascular Diseases Supplements Conference: 25es Journees Europeennes de la Societe Francaise de Cardiologie Paris France Conference Start: 2015;January.*
150. Abed HS, Nelson AJ, Richardson JD et al. Impact of weight reduction on pericardial fat volume and cardiac structure: Implications for atrial fibrillation in a randomized clinical trial. *European Heart Journal Conference: European Society of Cardiology, ESC Congress 2015;01.*
151. Abed HS, Nelson AJ, Richardson JD, Worthley SG, Wittert A, Leong DP. Impact of weight reduction on pericardial fat volume and cardiac structure: Implications for atrial fibrillation-a randomized clinical trial. *Heart Rhythm Conference: 36th Annual Scientific Sessions of the Heart Rhythm Society, Heart Rhythm 2015;May.*
152. Lavie CJ, De SA, Parto P et al. Obesity and Prevalence of Cardiovascular Diseases and Prognosis-The Obesity Paradox Updated. *Prog Cardiovasc Dis* 2016;58:537-47.
153. Banach M, Goch A, Misztal M, Rysz J, Jaszewski R, Goch JH. Predictors of paroxysmal atrial fibrillation in patients undergoing aortic valve replacement. *Journal of Thoracic and Cardiovascular Surgery* 134 (6) (pp 1569-1576), 2007;December.
154. Tsang TSM, Barnes ME, Miyasaka Y et al. Obesity as a risk factor for the progression of paroxysmal to permanent atrial fibrillation: A longitudinal cohort study of 21 years. *European Heart Journal* 29 (18) (pp 2227-2233), 2008;September.
155. Badheka A, Rathod A, Kizilbash M et al. An obesity paradox in outcomes of atrial fibrillation? *Heart Rhythm Conference: 30th Annual Scientific Sessions of the Heart Rhythm Society, Heart Rhythm 2009;May.*
156. Badheka AO, Rathod A, Kizilbash MA et al. Influence of Obesity on Outcomes in Atrial Fibrillation: Yet Another Obesity Paradox. *American Journal of Medicine* 123 (7) (pp 646-651), 2010;July.

157. Garadah T, Gabani S, Alawi MA, bu-Taleb A. Prevalence and Predisposing Factors of Atrial Fibrillation in a Multi-Ethnic Society: The Impact of Racial Differences in Bahrain. *Open J Cardiovasc Surg* 2011;4:9-16.
158. Needleman M, Calkins H. Atrial fibrillation ablation in obese patients. *Cardiac Electrophysiology Clinics* 4 (3) (pp 327-334), 2012;September.
159. Sotomi Y, Inoue K, Ito N et al. Incidence and risk factors for very late recurrence of atrial fibrillation after radiofrequency catheter ablation. *Europace* 2013;15:1581-6.
160. Overvad TF, Rasmussen LH, Skjoth F, Overvad K, Lip GY, Larsen TB. Body mass index and adverse events in patients with incident atrial fibrillation. *Am J Med* 2013;126:640-17.
161. Guijian L, Jinchuan Y, Rongzeng D, Jun Q, Jun W, Wenqing Z. Impact of body mass index on atrial fibrillation recurrence: a meta-analysis of observational studies. *Pacing Clin Electrophysiol* 2013;36:748-56.
162. Shoemaker MB, Muhammad R, Farrell M et al. Relation of morbid obesity and female gender to risk of procedural complications in patients undergoing atrial fibrillation ablation. *Am J Cardiol* 2013;111:368-73.
163. Wang J, Shao X-H, Zhang H et al. The influence of body mass index on outcomes in patients with atrial fibrillation: The obesity paradox. *Circulation Conference: American Heart Association* 2013;26.
164. Zhang H, Yang Y, Zhu J et al. Body mass index and mortality in patients with atrial fibrillation. *Cardiology (Switzerland) Conference: China Heart Congress International Heart Forum* 2013;September.
165. Fioravanti F, Brisinda D, Sorbo AR, Fenici R. BMI Reduction Decreases AF Recurrence Rate in a Mediterranean Cohort. *J Am Coll Cardiol* 2015;66:2264-5.
166. Hamatani Y, Ogawa H, Uozumi R et al. Low Body Weight Is Associated With the Incidence of Stroke in Atrial Fibrillation Patients - Insight From the Fushimi AF Registry. *Circ J* 2015;79:1009-17.
167. Inoue H, Kodani E, Atarashi H, Okumura K, Yamashita T, Origasa H. Impact of Body Mass Index on the Prognosis of Japanese Patients With Non-Valvular Atrial Fibrillation. *Am J Cardiol* 2016.
168. Bunch TJ, May HT, Bair TL et al. Long-term influence of body mass index on cardiovascular events after atrial fibrillation ablation. *J Interv Card Electrophysiol* 2016.
169. Proietti M, Lane DA, Lip GY. Relation of Nonvalvular Atrial Fibrillation to Body Mass Index (from the SPORTIF Trials). *Am J Cardiol* 2016.
170. Phan K, Khuong JN, Xu J, Kanagaratnam A, Yan TD. Obesity and postoperative atrial fibrillation in patients undergoing cardiac surgery: Systematic review and meta-analysis. *Int J Cardiol* 2016;217:49-57.

171. Sandhu RK, Ezekowitz J, Andersson U et al. The 'obesity paradox' in atrial fibrillation: observations from the ARISTOTLE (Apixaban for Reduction in Stroke and Other Thromboembolic Events in Atrial Fibrillation) trial. *Eur Heart J* 2016.
172. Chu CY, Lee WH, Hsu PC et al. Association of Increased Epicardial Adipose Tissue Thickness With Adverse Cardiovascular Outcomes in Patients With Atrial Fibrillation. *Medicine (Baltimore)* 2016;95:e2874.
173. Kwon Y, Norby FL, Jensen PN et al. Association of Smoking, Alcohol, and Obesity with Cardiovascular Death and Ischemic Stroke in Atrial Fibrillation: The Atherosclerosis Risk in Communities (ARIC) Study and Cardiovascular Health Study (CHS). *PLoS One* 2016;11:e0147065.
174. Senoo K, Lip GY. Body Mass Index and Adverse Outcomes in Elderly Patients With Atrial Fibrillation: The AMADEUS Trial. *Stroke* 2016;47:523-6.
175. Wang J, Yang YM, Zhu J et al. Overweight is associated with improved survival and outcomes in patients with atrial fibrillation. *Clin Res Cardiol* 2014;103:533-42.
176. Wong C, Brooks A, Sun M et al. Body mass index predicts postoperative atrial fibrillation: Results of a contemporary meta-analysis. *Heart Lung and Circulation Conference: Cardiac Society of Australia and New Zealand Annual Scientific Meeting and the International Society for Heart Research Australasian Section Annual Scientific Meeting* 2012;2012.
177. Wright GA, Thomas K, Gula L. Is body habitus a risk factor for atrial fibrillation and does it affect outcome of AF ablation? *Canadian Journal of Cardiology Conference: 66th Annual Meeting of the Canadian Cardiovascular Society Montreal, QC Canada Conference Start: 2013;October.*
178. Adrian VH, Kaw R, Pasupuleti V et al. Association between obesity and postoperative atrial fibrillation in patients undergoing cardiac surgery: A systematic review and meta-analysis. *Journal of the American College of Cardiology Conference: 62nd Annual Scientific Session of the American College of Cardiology and i2 Summit: Innovation in Intervention, ACC 13 San Francisco, CA United States Conference Start: 2013;12.*
179. Black MH, Wu J, Singer DE et al. Body mass index and outcomes among patients with atrial fibrillation from the atria2-CVRN study. *Circulation: Cardiovascular Quality and Outcomes Conference: American Heart Association's Quality of Care and Outcomes Research in Cardiovascular Disease and Stroke* 2013;May.
180. Wong CX, Sun MT, Pathak R et al. Body mass index predicts postoperative atrial fibrillation: Results of a contemporary meta-analysis. *Circulation Conference: American Heart Association* 2012;20.
181. Zhuang J, Lu Y, Tang K, Peng W, Xu Y. Influence of body mass index on recurrence and quality of life in atrial fibrillation patients after catheter ablation: a meta-analysis and systematic review. *Clin Cardiol* 2013;36:269-75.
182. Wang J, Yang YM, Zhu J, Zhang H, Shao XH. Obesity paradox in patients with atrial fibrillation and heart failure. *Int J Cardiol* 2014;176:1356-8.

183. Abed HS, Wittert GA, Leong DP et al. Effect of weight reduction and cardiometabolic risk factor management on symptom burden and severity in patients with atrial fibrillation: a randomized clinical trial. *JAMA* 2013;310:2050-60.
184. Jideus L, Blomstrom P, Nilsson L, Stridsberg M, Hansell P, Blomstrom-Lundqvist C. Tachyarrhythmias and triggering factors for atrial fibrillation after coronary artery bypass operations. *Annals of Thoracic Surgery* 69 (4) (pp 1064-1069), 2000;April.
185. Knyazer B, Abramov D, Bilenko N, Ganiel A, Ishay Y, Katz A. Incidence and predictors of atrial fibrillation after coronary artery bypass grafting in the Negev--are we different from the rest of the world?. [Hebrew]. *Harefuah* 147 (4) (pp 299-304, 375), 2008;Apr.
186. Golmohammadi M, Javid GE, Farajzadeh H. Incidence and risk factors for atrial fibrillation after first coronary artery bypass grafting in Urumiye Imam Khomeini Hospital from 2006 to 2008. *Iranian Cardiovascular Research Journal* 4 (2) (pp 86-90), 2010;2010.
187. Sun X, Boyce SW, Hill PC et al. Association of body mass index with new-onset atrial fibrillation after coronary artery bypass graft surgery. *Cardiovascular Revascularization Medicine Conference: Cardiovascular Research Technologies, CRT* 2010;July-September.
188. Tadic M, Ivanovic B, Zivkovic N. Predictors of atrial fibrillation following coronary artery bypass surgery. *Medical Science Monitor* 17 (1) (pp CR48-CR55), 2011;2011.
189. Efir JT, Gudimella P, O'Neal WT et al. Comparison of Risk of Atrial Fibrillation in Black Versus White Patients After Coronary Artery Bypass Grafting. *Am J Cardiol* 2016;117:1095-100.
190. Sun X, Boyce SW, Hill PC et al. Association of body mass index with new-onset atrial fibrillation after coronary artery bypass grafting operations. *Ann Thorac Surg* 2011;91:1852-8.
191. Pan W, Hindler K, Lee V-V, Vaughn WK, Collard CD. Obesity in diabetic patients undergoing coronary artery bypass graft surgery is associated with increased postoperative morbidity. *Anesthesiology* 104 (3) (pp 441-447), 2006;March.
192. Ho KM, Bertenshaw C, Same S et al. Differential associations between body mass index and outcomes after elective adult cardiac surgery: a linked data cohort study. *Anaesth Intensive Care* 2013;41:573-83.
193. Hernandez AV, Kaw R, Pasupuleti V et al. Association between obesity and postoperative atrial fibrillation in patients undergoing cardiac operations: a systematic review and meta-analysis. *Ann Thorac Surg* 2013;96:1104-16.
194. Verdecchia P, Dagenais G, Healey J et al. Blood pressure and other determinants of new-onset atrial fibrillation in patients at high cardiovascular risk in the Ongoing Telmisartan Alone and in Combination with Ramipril Global Endpoint Trial/Telmisartan Randomized Assessment Study in ACE Intolerant subjects with cardiovascular Disease studies. *Journal of Hypertension* 30 (5) (pp 1004-1014), 2012;May.

195. Grundvold I, Bodegard J, Nilsson PM et al. Body weight and risk of atrial fibrillation in 7,169 patients with newly diagnosed type 2 diabetes; an observational study. *Cardiovasc Diabetol* 2015;14:5.
196. ves-Cabratos L, Garcia-Gil M, Comas-Cufi M et al. Diabetes and new-onset atrial fibrillation in a hypertensive population. *Ann Med* 2016;48:119-27.
197. Zethelius B, Eliasson B, Eeg-Olofsson K, Svensson AM, Gudbjornsdottir S, Cederholm J. A new model for 5-year risk of cardiovascular disease in type 2 diabetes, from the Swedish National Diabetes Register (NDR). *Diabetes Res Clin Pract* 2011;93:276-84.
198. Arisoy E, Korkmaz I, Eren SH et al. Analyses of the risc factors for Atrial fibrillation among the patients who were admitted to emergency service. *Journal of Clinical and Analytical Medicine* 3 (2) (no pagination), 2012;April.
199. Liu HL, Lu XL, Guo ZP, Lin JX. [Association between metabolic syndrome and incidence of atrial fibrillation in essential hypertensive patients without left ventricular hypertrophy]. *Zhonghua Xin Xue Guan Bing Za Zhi* 2010;38:15-9.
200. Karajamaki AJ, Patsi OP, Savolainen M, Kesaniemi YA, Huikuri H, Ukkola O. Non-Alcoholic Fatty Liver Disease as a Predictor of Atrial Fibrillation in Middle-Aged Population (OPERA Study). *PLoS One* 2015;10:e0142937.
201. Acharya M, Harling L, Moscarelli M, Ashrafian H, Athanasiou T, Casula R. Influence of body mass index on outcomes after minimal-access aortic valve replacement through a J-shaped partial upper sternotomy. *J Cardiothorac Surg* 2016;11:74.
202. Guenancia C, Stamboul K, Garnier F et al. Obesity and new-onset atrial fibrillation in acute myocardial infarction: a gender specific risk factor. *Int J Cardiol* 2014;176:1039-41.
203. Gizurarson S, Stahlman M, Jeppsson A et al. Atrial fibrillation in patients admitted to coronary care units in western Sweden - focus on obesity and lipotoxicity. *J Electrocardiol* 2015;48:853-60.
204. Zethelius B, Gudbjornsdottir S, Eliasson B, Eeg-Olofsson K, Svensson AM, Cederholm J. Risk factors for atrial fibrillation in type 2 diabetes: report from the Swedish National Diabetes Register (NDR). *Diabetologia* 2015;58:2259-68.
205. Gao M, Sun J, Young N et al. Impact of Body Mass Index on Outcomes in Cardiac Surgery. *Journal of Cardiothoracic and Vascular Anesthesia* 30 (5) (pp 1308-1316), 2016;01.
206. Sumeray M, Steiner M, Sutton P, Treasure T. Age and obesity as risk factors in perioperative atrial fibrillation. *Lancet* 2 (8608) (pp 448), 1988;1988.
207. Zhu W, Wan R, Liu F et al. Relation of Body Mass Index With Adverse Outcomes Among Patients With Atrial Fibrillation: A Meta-Analysis and Systematic Review. *J Am Heart Assoc* 2016;5.

208. Ivanovic B, Tadic M, Bradic Z, Zivkovic N, Stanisavljevic D, Celic V. The influence of the metabolic syndrome on atrial fibrillation occurrence and outcome after coronary bypass surgery: A 3-year follow-up study. *Thoracic and Cardiovascular Surgeon* 62 (7 Supplement 01) (pp 561-568), 2014;01.
209. Garimella RS, Sears SF, Gehi AK. Depression and Physical Inactivity as Confounding the Effect of Obesity on Atrial Fibrillation. *Am J Cardiol* 2016;117:1760-4.
210. Haghjoo M, Salem N, Rafati M, Fazelifar A. Predictors of the atrial fibrillation following catheter ablation of typical atrial flutter. *Res Cardiovasc Med* 2013;2:90-4.
211. Im SI, Chun KJ, Park SJ, Park KM, Kim JS, On YK. Long-term Prognosis of Paroxysmal Atrial Fibrillation and Predictors for Progression to Persistent or Chronic Atrial Fibrillation in the Korean Population. *J Korean Med Sci* 2015;30:895-902.
212. Pawlowska-Jenerowicz W, Dabrowski M. The metabolic syndrome as a risk factor for idiopathic paroxysmal atrial fibrillation: A one year follow-up after a first episode of atrial fibrillation. *European Heart Journal Conference: European Society of Cardiology, ESC Congress 2009;September.*
213. Menzorov M, Shutov A, Serov V, Menzorova.E. Anthropometric parameters and early recurrence of atrial fibrillation. *European Journal of Internal Medicine Conference: 10th Congress of the European Federation of Internal Medicine Athens Greece Conference Start: 2011;October.*
214. Nigam A, Khairy P, Talajic M, Levesque S, Roy D. The Influence of body-mass index on outcomes in subjects with atrial fibrillation and heart failure: Data from the AF-CHF study. *European Heart Journal Conference: European Society of Cardiology, ESC Congress 2011;August.*
215. Lim T, Koay C, See V et al. Larger body size but not BMI predict longer atrial fibrillation ablation procedure times and increased arrhythmia recurrences on long term follow up. *Heart Lung and Circulation Conference: Cardiac Society of Australia and New Zealand Annual Scientific Meeting and the International Society for Heart Research Australasian Section Annual Scientific Meeting 2011;2011.*
216. Kim T-H, Park J, Park J-K et al. Pericardial fat volume is an independent predictor for clinical recurrence of atrial fibrillation and obstructive sleep apnea in patients who underwent catheter ablation: Over 600 case study. *Circulation Conference: American Heart Association 2013;26.*
217. Babar T, Mekuria S, Malik P, Chung MK. Obesity and recurrence of atrial fibrillation after cardioversion. *Journal of the American College of Cardiology Conference: American College of Cardiology 58th Annual Scientific Session and i2 Summit: Innovation in Intervention Orlando, FL United States Conference Start: 2009;2009.*
218. Smit MD, Groenveld HF, Achekar ID, Wiesfeld AC, Van G, I. Body mass index predicts subacute and overall atrial fibrillation recurrence in patients with early persistent atrial fibrillation. *Heart Rhythm Conference: 31st Annual Scientific Sessions of the Heart Rhythm Society, Heart Rhythm 2010;May.*

219. Guglin M, Chen R, Maradia K. Obesity is associated with higher recurrence of atrial fibrillation. European Heart Journal Conference: European Society of Cardiology, ESC Congress 2010;September.
220. Ferrer-Hita JJ, Rodriguez-Gonzalez A, Blanco-Palacios G et al. Statins therapy, body mass index and short and long-term prediction of atrial fibrillation recurrence after electrical cardioversion. Journal of Cardiovascular Electrophysiology Conference: Venice Arrhythmias 2011;October.
221. Vatutin M, Kalinkina N, Shevelok A, Kashanskaya O. Obesity as a risk factor for atrial fibrillation recurrence. Journal of Interventional Cardiac Electrophysiology Conference: 8th Annual Congress of the European Cardiac Arrhythmia Society, ECAS 2012;April.
222. Siebermair J, Clauss S, Schussler F et al. Role of hemodynamic parameters and body mass index in patients undergoing pulmonary vein isolation for treatment of atrial fibrillation. Journal of Interventional Cardiac Electrophysiology Conference: 9th Annual Congress of the European Cardiac Arrhythmia Society, ECAS 2013;April.
223. Lavie CJ, Milani RV, Ventura HO. Obesity and Cardiovascular Disease. Risk Factor, Paradox, and Impact of Weight Loss. Journal of the American College of Cardiology 53 (21) (pp 1925;26).
224. Gersh BJ, Tsang TS, Seward JB. The changing epidemiology and natural history of nonvalvular atrial fibrillation: clinical implications. Trans Am Clin Climatol Assoc 2004;115:149-59.
225. Gersh BJ, Tsang TSM, Barnes ME, Seward JB. The changing epidemiology of non-valvular atrial fibrillation: The role of novel risk factors. European Heart Journal, Supplement 7 (C) (pp C5-C11), 2005;May.
226. Wolk R, Somers VK. Obesity-related cardiovascular disease: Implications of obstructive sleep apnea. Diabetes, Obesity and Metabolism 8 (3) (pp 250-260), 2006;May.
227. Chen LY, Shen WK. Epidemiology of atrial fibrillation: a current perspective. Heart Rhythm 2007;4:S1-S6.
228. Somers VK, Gami AS, Block PC. Incident atrial fibrillation: Impact of obstructive sleep apnea and obesity. ACC Cardiosource Review Journal 16 (5) (pp 6-8), 2007;May.
229. Anand RG, Peters RW, Donahue TP. Obesity and dysrhythmias. Journal of the cardiometabolic syndrome 3 (3) (pp 149-154), 2008;2008.
230. Conen D, Osswald S, Albert CM. Epidemiology of atrial fibrillation. Swiss Med Wkly 2009;139:346-52.
231. Rosiak M, Dziuba M, Chudzik M et al. Risk factors for atrial fibrillation: Not always severe heart disease, not always so 'lonely'. Cardiol J 2010;17:437-42.

232. Kupczynska K, Wierzbowska-Drabik K. Obesity and cardiovascular risk - Current communications review. [Polish]. *Polski Przegląd Kardiologiczny* 12 (2) (pp 149-153), 2010;2010.
233. Kuhne M, Conen D. Atrial fibrillation in women. *Therapy* 7 (2) (pp 139-146), 2010;March.
234. Musil V. Risk factors of atrial fibrillation. [Slovak]. *Kardiologicka Revue* 12 (3) (pp 131-133), 2010;2010.
235. Mattioli AV. Lifestyle and atrial fibrillation. *Expert Rev Cardiovasc Ther* 2011;9:895-902.
236. Needleman M, Calkins H. The role of obesity and sleep apnea in atrial fibrillation. *Curr Opin Cardiol* 2011;26:40-5.
237. Artham SM, Lavie CJ, De SA, Ventura HO, Milani RV. Obesity, Age, and Cardiac Risk. *Current Cardiovascular Risk Reports* 5 (2) (pp 128-137), 2011;2011.
238. Lioni L, Korantzopoulos P, Letsas KP. Catheter ablation of atrial fibrillation in overweight and obese patients. *Journal of Atrial Fibrillation* 2 (8) (no pagination), 2011;December.
239. Zalesin KC, Franklin BA, Miller WM, Peterson ED, McCullough PA. Impact of Obesity on Cardiovascular Disease. *Medical Clinics of North America* 95 (5) (pp 919-937), 2011;September.
240. Asghar O, Alam U, Hayat SA, Aghamohammadzadeh R, Heagerty AM, Malik RA. Obesity, diabetes and atrial fibrillation; epidemiology, mechanisms and interventions. *Curr Cardiol Rev* 2012;8:253-64.
241. Schnabel RB. Can we predict the occurrence of atrial fibrillation? *Clin Cardiol* 2012;35 Suppl 1:5-9.
242. Al Chekatie MO, Akar JG. Epicardial fat and atrial fibrillation: A review. *Journal of Atrial Fibrillation* 2 (10) (no pagination), 2012;April.
243. Menezes AR, Lavie CJ, DiNicolantonio JJ et al. Cardiometabolic risk factors and atrial fibrillation. *Rev Cardiovasc Med* 2013;14:e73-e81.
244. Abed HS, Wittert GA. Obesity and atrial fibrillation. *Obes Rev* 2013;14:929-38.
245. Magnani JW, Hylek EM, Apovian CM. Obesity begets atrial fibrillation: a contemporary summary. *Circulation* 2013;128:401-5.
246. Menezes AR, Lavie CJ, DiNicolantonio JJ et al. Atrial fibrillation in the 21st century: a current understanding of risk factors and primary prevention strategies. *Mayo Clin Proc* 2013;88:394-409.
247. Menezes AR, Lavie CJ, DiNicolantonio JJ et al. Atrial fibrillation in the 21st century: A current understanding of risk factors and primary prevention strategies. *Mayo Clinic Proceedings* 88 (4) (pp 394-409), 2013;April.



248. Tadic M, Ivanovic B, Cuspidi C. What do we currently know about metabolic syndrome and atrial fibrillation? *Clinical Cardiology* 36 (11) (pp 654-662), 2013;November.
249. Asghar O, Alam U, Hayat SA, Aghamohammadzadeh R, Heagerty AM, Malik RA. Diabetes, obesity and atrial fibrillation: Epidemiology, mechanisms and interventions. *Journal of Atrial Fibrillation* 6 (2) (pp 47-55), 2013;August-September.
250. Rahman F, Kwan GF, Benjamin EJ. Global epidemiology of atrial fibrillation. *Nature Reviews Cardiology* 11 (11) (pp 639-654), 2014;25.
251. Andrade J, Khairy P, Dobrev D, Nattel S. The clinical profile and pathophysiology of atrial fibrillation: Relationships among clinical features, epidemiology, and mechanisms. *Circulation Research* 114 (9) (pp 1453-1468), 2014;25.
252. Nalliah CJ, Sanders P, Kottkamp H, Kalman JM. The role of obesity in atrial fibrillation. *Eur Heart J* 2015.
253. Menezes AR, Lavie CJ, De SA et al. Lifestyle Modification in the Prevention and Treatment of Atrial Fibrillation. *Prog Cardiovasc Dis* 2015;58:117-25.
254. Goudis CA, Korantzopoulos P, Ntalas IV, Kallergis EM, Ketikoglou DG. Obesity and atrial fibrillation: A comprehensive review of the pathophysiological mechanisms and links. *J Cardiol* 2015;66:361-9.
255. Miller JD, Aronis KN, Chrispin J et al. Obesity, Exercise, Obstructive Sleep Apnea, and Modifiable Atherosclerotic Cardiovascular Disease Risk Factors in Atrial Fibrillation. *J Am Coll Cardiol* 2015;66:2899-906.
256. Mahajan R, Lau DH, Sanders P. Impact of obesity on cardiac metabolism, fibrosis, and function. *Trends in Cardiovascular Medicine* 25 (2) (pp 119-126), 2015;01.
257. Wong CX, Ganesan AN, Selvanayagam JB. Epicardial fat and atrial fibrillation: current evidence, potential mechanisms, clinical implications, and future directions. *Eur Heart J* 2016.
258. Duraj I, Broncel M. [Obesity as a risk factor for atrial fibrillation]. *Pol Merkur Lekarski* 2016;40:5-8.
259. Hatem SN, Redheuil A, Gandjbakhch E. Cardiac adipose tissue and atrial fibrillation: the perils of adiposity. *Cardiovasc Res* 2016;109:502-9.
260. Iacobellis G. Is obesity a risk factor for atrial fibrillation? *Nat Clin Pract Cardiovasc Med* 2005;2:134-5.
261. Watanabe H, Tanabe N, Watanabe T et al. Metabolic syndrome and risk of development of atrial fibrillation: the Niigata preventive medicine study. *Circulation* 2008;117:1255-60.
262. Chamberlain AM, Agarwal SK, Ambrose M, Folsom AR, Soliman EZ, Alonso A. Metabolic syndrome and incidence of atrial fibrillation among blacks and whites in the Atherosclerosis Risk in Communities (ARIC) Study. *Am Heart J* 2010;159:850-6.

263. Smith JG, Platonov PG, Hedblad B, Engstrom G, Melander O. Atrial fibrillation in the Malmo Diet and Cancer study: a study of occurrence, risk factors and diagnostic validity. *Eur J Epidemiol* 2010;25:95-102.
264. Tanner RM, Baber U, Carson AP et al. Association of the metabolic syndrome with atrial fibrillation among United States adults (from the REasons for Geographic and Racial Differences in Stroke [REGARDS] Study). *Am J Cardiol* 2011;108:227-32.
265. Suzuki H, Ohira T, Takeishi Y et al. Increased prevalence of atrial fibrillation after the Great East Japan Earthquake: Results from the Fukushima Health Management Survey. *Int J Cardiol* 2015;198:102-5.
266. O'Neal WT, Judd SE, Limdi NA et al. Differential Impact of Risk Factors in Blacks and Whites in the Development of Atrial Fibrillation: the Reasons for Geographic And Racial Differences in Stroke (REGARDS) Study. *J Racial Ethn Health Disparities* 2016.
267. Alonso A, Bahnon JL, Gaussoin SA et al. Effect of an intensive lifestyle intervention on atrial fibrillation risk in individuals with type 2 diabetes: The Look AHEAD randomized trial. *Am Heart J* 2015;170:770-7.



|                                 |                                          |                                        |                                                                       |                                                           |                                      |                                                                                            |                                                                                                                              |                                                                                                                                                |
|---------------------------------|------------------------------------------|----------------------------------------|-----------------------------------------------------------------------|-----------------------------------------------------------|--------------------------------------|--------------------------------------------------------------------------------------------|------------------------------------------------------------------------------------------------------------------------------|------------------------------------------------------------------------------------------------------------------------------------------------|
|                                 |                                          |                                        |                                                                       |                                                           | BMI, men                             | 25.0-29.9<br>≥30.0<br>Per unit                                                             | 1.12 (0.80-1.57)<br>1.64 (1.07-2.51)<br>1.05 (1.01-1.08)                                                                     |                                                                                                                                                |
|                                 |                                          |                                        |                                                                       |                                                           | BMI, women                           | 18.5-24.9<br>25.0-29.9<br>≥30.0<br>Per unit                                                | 1.00<br>1.19 (0.74-1.92)<br>0.96 (0.42-2.20)<br>0.99 (0.93-1.06)                                                             |                                                                                                                                                |
|                                 |                                          |                                        |                                                                       |                                                           |                                      | 18.5-24.9<br>25.0-29.9<br>≥30.0<br>Per unit                                                | 1.00<br>1.02 (0.63-1.64)<br>2.02 (1.20-3.39)<br>1.06 (1.02-1.11)                                                             |                                                                                                                                                |
| Gami AS et al, 2007, USA        | Olmsted County Study                     | 1987-2003, 4.7 years follow-up         | 3542 men and women, mean age 49 years: 133 AF cases                   | Unclear                                                   | BMI                                  | Per 1 unit                                                                                 | 1.07 (1.05-1.10)                                                                                                             | Age, sex, CAD, lowest nocturnal oxygen saturation                                                                                              |
| Minami M et al, 2009, Japan     | Ishikawa Prefecture                      | 1998-2006, NA                          | 69 AF cases (men) 138 controls (nested case-control study)            | Unclear                                                   | BMI                                  | Per 1 unit                                                                                 | 1.11 (0.98-1.26)                                                                                                             | Age, time period, SBP, TCH, gamma-glutamyltranspeptidase, uric acid, fasting plasma glucose, hemoglobin, cardiomegaly, Brinkman index, alcohol |
| Rosengren A et al, 2009, Sweden | The Multifactor Primary Prevention Study | 1970-1973 - 2004, 34.3 years follow-up | 6903 men, age 47-56 years: 1253 AF hospital discharge diagnosis cases | Measured (current) Self-reported (weight at age 20 years) | BMI at age 20                        | <21<br>21-22.2<br>22.3-23.7<br>>23.7<br>Per 1 unit                                         | 1.00<br>1.02 (0.87-1.20)<br>1.06 (0.91-1.25)<br>1.28 (1.10-1.50)<br>1.05 (1.02-1.08)                                         | Age                                                                                                                                            |
|                                 |                                          |                                        |                                                                       |                                                           | Midlife BMI                          | <20.00<br>20.00-22.49<br>22.50-24.99<br>25.00-27.49<br>27.50-29.99<br>≥30.00<br>Per 1 unit | 1.11 (0.67-1.78)<br>1.00<br>1.15 (0.94-1.41)<br>1.32 (1.10-1.66)<br>1.50 (1.21-1.88)<br>1.56 (1.20-2.02)<br>1.04 (1.02-1.06) | Age, intercurrent heart failure, intercurrent MI, SBP, treatment for hypertension, smoking, diabetes, alcohol, occupational class              |
|                                 |                                          |                                        |                                                                       |                                                           | Body surface area                    | <1.75 m <sup>2</sup><br>1.75-1.83<br>1.83-1.91<br>>1.91                                    | 1.00<br>1.39 (1.16-1.66)<br>1.52 (1.28-1.81)<br>1.95 (1.65-2.31)                                                             |                                                                                                                                                |
|                                 |                                          |                                        |                                                                       |                                                           | Weight change from age 20 to midlife | Loss of more than 4%<br>-4 to +4%<br>+5-15%<br>+16-35%                                     | 1.11 (0.84-1.47)<br>1.00<br>1.08 (0.90-1.30)<br>1.22 (1.02-1.47)                                                             |                                                                                                                                                |

|                                           |                                                       |                                                |                                                               |               |                                                                            |                                                                                                             |                                                                                                                                              |                                                                                                                                                                                                                                                                                                |
|-------------------------------------------|-------------------------------------------------------|------------------------------------------------|---------------------------------------------------------------|---------------|----------------------------------------------------------------------------|-------------------------------------------------------------------------------------------------------------|----------------------------------------------------------------------------------------------------------------------------------------------|------------------------------------------------------------------------------------------------------------------------------------------------------------------------------------------------------------------------------------------------------------------------------------------------|
|                                           |                                                       |                                                |                                                               |               |                                                                            | +>35%                                                                                                       | 1.31 (1.02-1.68)                                                                                                                             |                                                                                                                                                                                                                                                                                                |
| Schnabel RB et al, 2010, Iceland          | Age, Gene/ Environment Susceptibility-Reykjavik Study | 2002-2006 – 2008, 5 years follow-up            | 4238 men and women, age 45-95 years: 226 AF cases             | Measured      | BMI                                                                        | Per 5 units                                                                                                 | 1.22 (1.05-1.41)                                                                                                                             | Age, sex, SBP, hypertension treatment, PR interval, prevalent heart failure                                                                                                                                                                                                                    |
| Schnabel RB et al, 2010, USA              | Cardiovascular Health Study                           | 1989-1990/ 1992-1993 – 2005, 5 years follow-up | 5410 men and women, age 45-95 years: 958 AF cases             | Measured      | BMI, whites<br>BMI, African Americans                                      | Per 5 units<br>Per 5 units                                                                                  | 1.14 (1.05-1.23)<br>1.29 (1.10-1.51)                                                                                                         | Age, sex, SBP, hypertension treatment, PR interval, valvular heart disease (whites only), prevalent heart failure                                                                                                                                                                              |
| Hodgkinson JA et al, 2011, United Kingdom | UK General Practice Research Database                 | 1987-2007, NA                                  | 44348 AF cases<br>161104 controls (nested case-control study) | Measured      | BMI                                                                        | 10-19<br>20-24<br>25-29<br>≥30                                                                              | 1.14 (1.09-1.19)<br>1.00<br>1.02 (0.91-1.14)<br>1.29 (1.15-1.45)                                                                             | Age, sex, practice, calendar time, COPD, cerebrovascular accident, diabetes, heart failure, hyperthyroidism, IHD, hypertension, bisphosphonates, oral glucocorticoids, statins, xanthine derivate, beta-2 agonists, drugs affecting the renin-angiotensin-aldosterone system, alcohol, smoking |
| Grundvold I et al, 2012, Norway           | Oslo Cardiovascular Health Survey                     | 1972-1975 – 2008, 30 years follow-up           | 2014 men, age 40-59 years: 270 AF cases                       | Measured      | BMI                                                                        | Per 2.8 units                                                                                               | 1.16 (1.02-1.32)                                                                                                                             | Age, SBP, DBP, physical fitness, exercise maximal heart rated, pulse pressure, exercise maximal SBP                                                                                                                                                                                            |
| Korda RJ et al, 2012, Australia           | The 45 and Up Study                                   | 2006-2009, 2.3 years follow-up                 | 246361 men and women, age ≥45 years: 1880 AF cases            | Self-reported | BMI, age 45-64 years<br><br>BMI, age 65-79 years<br><br>BMI, age ≥80 years | 18.5-<25.0<br>25.0-<30.0<br>≥30.0<br>18.5-<25.0<br>25.0-<30.0<br>≥30.0<br>18.5-<25.0<br>25.0-<30.0<br>≥30.0 | 1.00<br>1.37 (1.09-1.72)<br>1.84 (1.45-2.33)<br>1.00<br>1.07 (0.91-1.26)<br>1.33 (1.11-1.60)<br>1.00<br>1.04 (0.87-1.25)<br>1.15 (0.88-1.50) | Age, sex, region of residence, household income, smoking, alcohol, private health insurance status,                                                                                                                                                                                            |
| Alonso A et al, 2013, USA                 | Framingham Heart Study Offspring cohort               | 1995-1998 - 2005, NA years of follow-up        | 2838 men and women, mean age 60 years: 143 cases              | Measured      | Weight                                                                     | Per 15 kg                                                                                                   | 1.22 (1.03-1.44)                                                                                                                             | Age, sex                                                                                                                                                                                                                                                                                       |
| Alonso A et al, 2013, USA                 | Cardiovascular Health Study                           | 1989-1990, 1992-1993 - 2000, NA years          | 5043 men and women, age ≥65 years: 624 cases                  | Measured      | Weight, whites<br>Weight, blacks                                           | Per 15 kg<br>Per 15 kg                                                                                      | 1.18 (1.07-1.31)<br>1.31 (1.04-1.65)                                                                                                         | Age, sex                                                                                                                                                                                                                                                                                       |

|                                       |                                                       |                                         |                                                            |               |                                                                                    |                                                                            |                                                                                                                      |                                                                                                                                                       |
|---------------------------------------|-------------------------------------------------------|-----------------------------------------|------------------------------------------------------------|---------------|------------------------------------------------------------------------------------|----------------------------------------------------------------------------|----------------------------------------------------------------------------------------------------------------------|-------------------------------------------------------------------------------------------------------------------------------------------------------|
|                                       |                                                       | of follow-up                            |                                                            |               |                                                                                    |                                                                            |                                                                                                                      |                                                                                                                                                       |
| Alonso A et al, 2013, USA             | Atherosclerosis Risk in Communities Cohort            | 1996-1998, -2005, NA years of follow-up | 10675 men and women, age 45-64 years: 419 cases            | Measured      | Weight, whites<br>Weight, blacks                                                   | Per 15 kg<br>Per 15 kg                                                     | 1.39 (1.26-1.53)<br>1.44 (1.08-1.91)                                                                                 | Age, sex                                                                                                                                              |
| Alonso A et al, 2013, Island          | Age, Gene/ Environment Susceptibility Reykjavik Study | 2002-2006 -2011, NA years of follow-up  | 4469 men and women, mean age 76 years: 408 cases           | Measured      | Weight                                                                             | Per 15 kg                                                                  | 1.17 (1.04-1.31)                                                                                                     | Age, sex                                                                                                                                              |
| Alonso A et al, 2013, Netherlands     | Rotterdam Study                                       | 1997-2005, NA years of follow-up        | 3203 men and women, age $\geq 55$ years: 177 cases         | Measured      | Weight                                                                             | Per 15 kg                                                                  | 1.55 (1.28-1.87)                                                                                                     | Age, sex                                                                                                                                              |
| Conen D et al, 2013, USA              | Women's Health Study                                  | NA-2011, 16.4 years follow-up           | 34713 women, age $\geq 45$ years: 796 AF cases             | Self-reported | Body weight                                                                        | Per 10 kg                                                                  | 1.07 (0.998-1.14)                                                                                                    | Age, hypertension, diabetes, race, education, alcohol, smoking, exercise, height                                                                      |
| Karasoy D et al, 2013, Denmark        | Danish Pregnant Women                                 | 2004-2009 -2010, 4.6 years follow-up    | 271203 women, mean age 30.6 years: 110 AF hospitalizations | Measured      | BMI                                                                                | <18.5<br>18.5-25<br>25-29.9<br>30-35<br>>35                                | 1.65 (0.88-3.35)<br>1.00<br>1.13 (0.68-1.88)<br>2.04 (1.13-3.69)<br>3.50 (1.86-6.58)                                 | Age, hyperthyroidism, previous use of beta-blockers                                                                                                   |
| Nyrnes A et al, 2013, Norway          | The Tromsø study                                      | 1994-1995 -2007, 11 years follow-up     | 22815 men and women, age 25-96 years: 461/361 AF cases     | Measured      | BMI, all AF, men<br>BMI, lone AF, men<br>BMI, all AF, women<br>BMI, lone AF, women | Per 3.2 units<br>Per 3.2 units<br>Per 4.1 units<br>Per 4.1 units           | 1.16 (1.06-1.27)<br>1.47 (1.32-1.63)<br>1.47 (0.90-2.40)<br>2.13 (1.47-3.09)                                         | Age, height, total cholesterol, HDL-cholesterol, hypertension, palpitations, diabetes (all AF only), CHD (all AF only)                                |
| Azarbal F et al, 2014, USA            | Women's Health Initiative                             | 1994-1998 -2011, 11.5 years follow-up   | 81317 women, age 50-79 years: 9792 AF cases                | Measured      | BMI                                                                                | Per 5 units                                                                | 1.12 (1.10-1.14)                                                                                                     | Age, race/ethnicity, education, hypertension, diabetes, hyperlipidemia, CAD, heart failure, PAD, current smoking, physical activity                   |
| Reeves GK et al, 2014, United Kingdom | Million Women's Study                                 | 1996-2001 -2008, 9.2 years follow-up    | 1251619 women, age 50-64 years: 11078 AF hospitalizations  | Self-reported | BMI                                                                                | <22.5<br>22.5-24.9<br>25.0-29.9<br>30.0-34.9<br>$\geq 35.0$<br>Per 5 units | 0.95 (0.91-1.00)<br>1.00 (0.96-1.04)<br>1.24 (1.20-1.28)<br>1.75 (1.67-1.82)<br>2.90 (2.74-3.07)<br>1.43 (1.40-1.46) | Age, geographical region, SES, age at 1 <sup>st</sup> birth, parity, smoking status, alcohol intake, physical activity, time since menopause, HRT use |
| Huxley RR et                          | Atherosclerosis                                       | 1987-2009,                              | 14219 men and                                              | Measured      | BMI                                                                                | 18.5-24.9                                                                  | 1.00                                                                                                                 | Age, sex, race, study site, education,                                                                                                                |

|                              |                                      |                                   |                                                                                   |               |                                                                                                                                    |                                                                                                                                                                                                                                                                |                                                                                                                                                                                                                                                                                                                |                                                                                                                                                                                |
|------------------------------|--------------------------------------|-----------------------------------|-----------------------------------------------------------------------------------|---------------|------------------------------------------------------------------------------------------------------------------------------------|----------------------------------------------------------------------------------------------------------------------------------------------------------------------------------------------------------------------------------------------------------------|----------------------------------------------------------------------------------------------------------------------------------------------------------------------------------------------------------------------------------------------------------------------------------------------------------------|--------------------------------------------------------------------------------------------------------------------------------------------------------------------------------|
| al, 2014, USA                | Risk in Communities Study            | ~18.2 years follow-up             | women, age 45-64 years: 1775 AF cases                                             |               | <p>Waist circumference</p> <p>Weight change, men</p> <p>Weight change, women</p>                                                   | <p>25.0-29.9<br/>≥30.0</p> <p>≤92/≤84 cm<br/>93-98/85-94<br/>99-105/95-105<br/>≥106/≥106</p> <p>&gt;5% loss<br/>0-5% loss<br/>0 to 4.9% gain<br/>5-9.9 gain<br/>≥10% gain</p> <p>&gt;5% loss<br/>0-5% loss<br/>0 to 4.9% gain<br/>5-9.9 gain<br/>≥10% gain</p> | <p>1.20 (1.06-1.36)<br/>1.95 (1.72-2.21)<br/>1.00<br/>1.18 (1.01-1.37)<br/>1.52 (1.31-1.76)<br/>2.13 (1.85-2.46)<br/>1.52 (1.16-1.99)<br/>1.01 (0.79-1.31)<br/>1.00<br/>1.33 (1.04-1.70)<br/>1.61 (1.24-2.11)<br/>1.45 (1.08-1.93)<br/>1.24 (0.93-1.64)<br/>1.00<br/>1.24 (0.94-1.62)<br/>1.19 (0.90-1.55)</p> | income, prior CVD, cigarette smoking, height, physical activity, alcohol                                                                                                       |
| Sandhu RK et al, 2014, USA   | Women's Health Study                 | 1993 – 2004, 16.4 years follow-up | 34720 women, age ≥45 years: 690 paroxysmal AF cases<br>349 nonparoxysmal AF cases | Self-reported | <p>BMI, paroxysmal AF</p> <p>BMI, nonparoxysmal AF</p> <p>BMI, paroxysmal AF</p> <p>BMI, nonparoxysmal AF</p>                      | <p>&lt;25<br/>25-&lt;30<br/>≥30</p> <p>Per 1 unit</p> <p>&lt;25<br/>25-&lt;30<br/>≥30</p> <p>Per 1 unit</p> <p>&lt;25<br/>25-&lt;30<br/>≥30</p> <p>Per 1 unit</p>                                                                                              | <p>1.00<br/>1.30 (1.08-1.55)<br/>1.49 (1.22-1.83)<br/>1.03 (1.02-1.05)<br/>1.00<br/>1.51 (1.15-1.97)<br/>2.56 (1.93-3.40)<br/>1.07 (1.05-1.09)<br/>1.00<br/>1.30 (1.08-1.55)<br/>1.50 (1.22-1.84)<br/>1.03 (1.02-1.05)<br/>1.00<br/>1.51 (1.15-1.97)<br/>2.57 (1.93-3.40)<br/>1.07 (1.05-1.09)</p>             | Age, aspirin, vitamin E, beta-carotene, hypertension, diabetes, cholesterol, alcohol, smoking, exercise,<br><br>+ interim MI, stroke, revascularization, heart failure         |
| Frost L et al, 2014, Denmark | Danish Diet, Cancer and Health Study | 1993-1997 - 13.5 years follow-up  | 55273 men and women, age 50-64 years: 1669/912 AF cases                           | Measured      | <p>Weight</p> <p>Weight, adj. height</p> <p>BMI</p> <p>Waist circumference</p> <p>Hip circumference</p> <p>WHR</p> <p>Fat mass</p> | <p>Per 14.1 kg</p> <p>Per 14.1 kg</p> <p>Per 4.1 units</p> <p>Per 12.7 cm</p> <p>Per 7.9 cm</p> <p>Per 0.10 units</p> <p>Per 8.3 kg</p>                                                                                                                        | <p>1.36 (1.31-1.40)<br/>1.29 (1.24-1.34)<br/>1.26 (1.21-1.30)<br/>1.28 (1.23-1.33)<br/>1.29 (1.24-1.33)<br/>1.11 (1.07-1.16)<br/>1.29 (1.24-1.33)</p>                                                                                                                                                          | Age, smoking status, fruit and vegetables, alcohol, physical activity, total energy, education, hypertension, diabetes, hypercholesterolemia, IHD, CHF, vascular heart disease |

|                                  |                                           |                                        |                                                     |          |                                                                                                                                                                                                                                                                                                                         |                                                                                                                                                                                                                                                                                                                                                                         |                                                                                                                                                                                                                                                                                                                                                                                                                                               |                                                                                                                                                                                                                                                                           |
|----------------------------------|-------------------------------------------|----------------------------------------|-----------------------------------------------------|----------|-------------------------------------------------------------------------------------------------------------------------------------------------------------------------------------------------------------------------------------------------------------------------------------------------------------------------|-------------------------------------------------------------------------------------------------------------------------------------------------------------------------------------------------------------------------------------------------------------------------------------------------------------------------------------------------------------------------|-----------------------------------------------------------------------------------------------------------------------------------------------------------------------------------------------------------------------------------------------------------------------------------------------------------------------------------------------------------------------------------------------------------------------------------------------|---------------------------------------------------------------------------------------------------------------------------------------------------------------------------------------------------------------------------------------------------------------------------|
|                                  |                                           |                                        |                                                     |          | Fat mass, adj. LBM<br>Fat%<br>Lean body mass<br>LBM, adj. height<br>LBM, adj. fat mass                                                                                                                                                                                                                                  | Per 8.3 kg<br>Per 7.4%<br>Per 9.7 kg<br>Per 9.7 kg<br>Per 9.7 kg                                                                                                                                                                                                                                                                                                        | 1.03 (0.99-1.09)<br>1.19 (1.14-1.24)<br>1.40 (1.35-1.45)<br>1.38 (1.32-1.45)<br>1.37 (1.30-1.44)                                                                                                                                                                                                                                                                                                                                              |                                                                                                                                                                                                                                                                           |
| Schmidt M et al, 2014, Denmark   | Danish Military Conscripts                | 1977-2012, 26 years follow-up          | 12850 men, median age 19 years: 227 AF cases        | Measured | BMI                                                                                                                                                                                                                                                                                                                     | <18.5<br>18.5-24.9<br>25.0-29.9<br>≥30.0                                                                                                                                                                                                                                                                                                                                | 0.99 (0.52-1.87)<br>1.00<br>2.08 (1.48-2.92)<br>2.87 (1.46-5.62)                                                                                                                                                                                                                                                                                                                                                                              | Years of education, height                                                                                                                                                                                                                                                |
| Knuiman M et al, 2014, Australia | The Busseleton Health Study               | 1994-1995 - 2010, 15 years follow-up   | 4267 men and women, age 25-84 years: 343 AF cases   | Measured | BMI<br>WC<br>WHR                                                                                                                                                                                                                                                                                                        | Per 4.2 units<br>Per 12.7 cm<br>Per 0.09 units                                                                                                                                                                                                                                                                                                                          | 1.34 (1.21-1.49)<br>1.37 (1.21-1.55)<br>1.21 (1.02-1.43)                                                                                                                                                                                                                                                                                                                                                                                      | Age, sex, height                                                                                                                                                                                                                                                          |
| Aronis KN et al, 2015, USA       | Health, Aging, and Body Composition Study | 1997-1998 – 2008, 10 years follow-up   | 2717 men and women, mean age 74 years: 371 AF cases | Measured | BMI, all<br>Abdominal circumference<br>SAT<br>VAT<br>SAT+VAT<br>Total fat mass<br>Total fat percent<br>BMI, whites<br>Abdominal circumference<br>SAT<br>VAT<br>SAT+VAT<br>Total fat mass<br>Total fat percent<br>BMI, blacks<br>Abdominal circumference<br>SAT<br>VAT<br>SAT+VAT<br>Total fat mass<br>Total fat percent | Per 4.7 units<br>Per 13 cm<br><br>Per 120 cm <sup>2</sup><br>Per 67 cm <sup>2</sup><br>Per 1 SD<br>Per 9 kg<br>Per 8%<br>Per 4.7 units<br>Per 13 cm<br><br>Per 120 cm <sup>2</sup><br>Per 67 cm <sup>2</sup><br>Per 1 SD<br>Per 9 kg<br>Per 8%<br>Per 4.7 units<br>Per 13 cm<br><br>Per 120 cm <sup>2</sup><br>Per 67 cm <sup>2</sup><br>Per 1 SD<br>Per 9 kg<br>Per 8% | 1.14 (1.02-1.28)<br>1.16 (1.04-1.28)<br><br>1.11 (0.97-1.27)<br>1.07 (0.96-1.19)<br>1.10 (0.98-1.25)<br>1.13 (1.002-1.27)<br>1.03 (0.87-1.22)<br>1.11 (0.96-1.30)<br>1.13 (0.94-1.36)<br><br>1.16 (0.98-1.38)<br>1.04 (0.92-1.19)<br>1.12 (0.96-1.30)<br>1.16 (0.99-1.34)<br>1.06 (0.85-1.31)<br>1.13 (0.94-1.36)<br>1.27 (1.06-1.52)<br><br>0.98 (0.78-1.22)<br>1.16 (0.93-1.45)<br>1.04 (0.84-1.29)<br>1.04 (0.86-1.27)<br>0.92 (0.69-1.23) | Age, sex, race, site, smoking, adiposity measure, systolic and diastolic blood pressure, treatment of hypertension, total to HDL cholesterol ratio, heart rate, ECG left ventricular hypertrophy, PR interval, prevalent heart failure, coronary artery disease, diabetes |
| Azarbal F et al, 2015, USA       | Women's Health Initiative                 | 1994-1998 – 2011, 11.6 years follow-up | 8832 women, mean age 63.3 years: 1035 AF cases      | Measured | BMI<br>Total body lean mass<br>Central lean mass                                                                                                                                                                                                                                                                        | Per 5 units<br>Per 5 units<br>Per 5 units                                                                                                                                                                                                                                                                                                                               | 1.07 (1.01-1.13)<br>1.21 (1.14-1.29)<br>1.49 (1.31-1.69)                                                                                                                                                                                                                                                                                                                                                                                      | Age, ethnicity, education, hypertension, diabetes, hyperlipidemia, coronary artery                                                                                                                                                                                        |



|                                     |                                                    |                                                  |                                                     |          |                                                                                                                                                                                                                                                 |                                                                                                                                                                                                                                                                          |                                                                                                                                                                                                                                                                                                                                              |                                                                                                                                          |
|-------------------------------------|----------------------------------------------------|--------------------------------------------------|-----------------------------------------------------|----------|-------------------------------------------------------------------------------------------------------------------------------------------------------------------------------------------------------------------------------------------------|--------------------------------------------------------------------------------------------------------------------------------------------------------------------------------------------------------------------------------------------------------------------------|----------------------------------------------------------------------------------------------------------------------------------------------------------------------------------------------------------------------------------------------------------------------------------------------------------------------------------------------|------------------------------------------------------------------------------------------------------------------------------------------|
|                                     |                                                    |                                                  |                                                     |          | Peripheral lean mass<br>Total LBMI<br>Central LBMI<br>Peripheral LBMI<br>Total body fat mass<br>Central fat mass<br>Peripheral fat mass<br>Total body fat%<br>Central fat% of central mass<br>Central fat% of total fat mass                    | Per 5 units<br>Per 5 units<br>Per 5 units<br>Per 5 units<br>Per 5 kg<br>Per 5 kg<br>Per 5 kg<br>Per 5 %<br>Per 5 %<br>Per 5 %                                                                                                                                            | 1.37 (1.21-1.56)<br>1.39 (1.15-1.67)<br>2.03 (1.41-2.91)<br>1.74 (1.22-2.50)<br>1.04 (1.01-1.07)<br>1.05 (1.00-1.11)<br>1.10 (1.04-1.16)<br>1.00 (0.95-1.04)<br>0.98 (0.94-1.03)<br>0.95 (0.90-0.99)                                                                                                                                         | disease, heart failure, peripheral artery disease, smoking, dietary modification, and hormone intervention                               |
| Vermond RA et al, 2015, Netherlands | Prevention of Renal and Vascular End-Stage Disease | NA-2008, 9.7 years follow-up                     | 8265 men and women, age 28-75 years: 265 AF cases   | Measured | BMI                                                                                                                                                                                                                                             | Per 5 units                                                                                                                                                                                                                                                              | 1.45 (1.21-1.74)                                                                                                                                                                                                                                                                                                                             | Age, sex                                                                                                                                 |
| Nyström PK et al, 2015, Sweden      | Stockholm County Study                             | 1997-1999 – 2012, 13.6 years follow-up           | 1924 men and 2097 women, age 60 years: 285 AF cases | Measured | Weight<br>Waist circumference<br>Hip circumference<br>SAD<br>BMI<br>WHR<br>BMI, no MetS<br>BMI, MetS<br>BMI, no MetS<br>BMI, MetS<br>BMI, no MetS<br>BMI, MetS<br>WC, no MetS<br>WC, MetS<br>WC, no MetS<br>WC, MetS<br>WC, no MetS<br>WC, MetS | Per 14.2 kg<br>Per 12.4 cm<br>Per 8.4 cm<br>Per 2.9 cm<br>Per 4.2 kg/m <sup>2</sup><br>Per 0.087 units<br>18.5-24.9<br>18.5-24.9<br>25.0-29.9<br>25.0-29.9<br>≥30.0<br>≥30.0<br><94/<80 cm<br><94/<80 cm<br>94-101.9/80-87.9<br>94-101.9/80-87.9<br>≥102/≥88<br>≥102/≥88 | 1.47 (1.31-1.65)<br>1.35 (1.19-1.54)<br>1.38 (1.24-1.53)<br>1.28 (1.14-1.44)<br>1.25 (1.12-1.40)<br>1.05 (0.88-1.25)<br>1.00<br>1.17 (0.51-2.70)<br>1.01 (0.73-1.40)<br>1.67 (1.16-2.41)<br>1.75 (1.11-2.74)<br>1.92 (1.34-2.74)<br>1.00<br>1.45 (0.88-2.38)<br>1.19 (0.80-1.78)<br>1.33 (0.86-2.04)<br>1.37 (0.91-2.07)<br>2.03 (1.44-2.87) | Hypertension, elevated fasting glucose, sex, smoking, alcohol, history of MI, regular moderate-intensity physical activity, Swedish-born |
| Kokubo Y et al, 2015, Japan         | The Suita Study                                    | 1989-1996/1996-1998/1992-2006 – 2013, 12.8 years | 6906 men and women, age 30-84 years: 253 AF cases   | Measured | BMI                                                                                                                                                                                                                                             | <18.5<br>18.5-<25.0<br>≥25.0                                                                                                                                                                                                                                             | 1.02 (0.60-1.72)<br>1.00<br>1.35 (1.01-1.80)                                                                                                                                                                                                                                                                                                 | Age, sex, blood pressure, smoking, drinking, hyperlipidemia, diabetes mellitus, impaired fasting glucose                                 |

|                                  |                                                                       |                                                   |                                                        |          |                                                                                               |                                                                                                                                                                                 |                                                                                                                                                                                                                                                                      |                                                                                                                                                                                                                            |
|----------------------------------|-----------------------------------------------------------------------|---------------------------------------------------|--------------------------------------------------------|----------|-----------------------------------------------------------------------------------------------|---------------------------------------------------------------------------------------------------------------------------------------------------------------------------------|----------------------------------------------------------------------------------------------------------------------------------------------------------------------------------------------------------------------------------------------------------------------|----------------------------------------------------------------------------------------------------------------------------------------------------------------------------------------------------------------------------|
|                                  |                                                                       | follow-up                                         |                                                        |          |                                                                                               |                                                                                                                                                                                 |                                                                                                                                                                                                                                                                      |                                                                                                                                                                                                                            |
| Berkovitch A et al, 2016, Israel | The Institute for Medical Screening of the Chaim Sheba Medical Center | 2000 - NA, 6.4 years follow-up                    | 18290 men and women, mean age 48.9 years: 288 AF cases | Measured | BMI                                                                                           | 18.5-24.9<br>25.0-29.9<br>≥30.0                                                                                                                                                 | 1.00<br>1.49 (1.11-2.00)<br>2.34 (1.64-3.34)                                                                                                                                                                                                                         | Age, sex, IHD, diabetes mellitus, hypertension, LDL cholesterol, HDL cholesterol, physical activity                                                                                                                        |
| Diouf I et al, 2016, Australia   | Australian Diabetes, Obesity and Lifestyle study cohort               | 1999/2000 - 2004/2005, 5 years follow-up          | 5389 men and women, age ≥35 years: 53 AF cases         | Measured | BMI                                                                                           | 18.5-24.9<br>25.0-29.9<br>≥30.0                                                                                                                                                 | 1.0<br>1.0 (0.7-1.5)<br>1.4 (0.5-4.2)                                                                                                                                                                                                                                | Age, sex, smoking status, usual number of alcoholic drinks, physical activity, level of education                                                                                                                          |
| Karas MG et al, 2016, USA        | Cardiovascular Health Study                                           | 1989-2008, 13 years follow-up                     | 4276 men and women, age ≥65 years: 1050 AF cases       | Measured | BMI<br>Weight<br>Waist circumference<br>Hip circumference<br>WHR<br>Fat mass<br>Fat-free mass | Per 4.7 units<br>Per 14.6 kg<br>Per 13.2 cm<br>Per 10.0 cm<br>Per 0.09 units<br>Per 10.8 kg<br>Per 9.2 kg                                                                       | 1.08 (1.02-1.15)<br>1.21 (1.13-1.29)<br>1.14 (1.07-1.22)<br>1.17 (1.10-1.24)<br>1.02 (0.96-1.10)<br>1.16 (1.09-1.24)<br>1.26 (1.13-1.40)                                                                                                                             | Age, sex, race, smoking status                                                                                                                                                                                             |
| Kang SH et al, 2016, Korea       | Korea National Health Insurance Corporation Study                     | 2003-2004 - NA, 9.0 years follow-up               | 132063 men and women, age ≥40 years: 3237 AF cases     | Measured | BMI, all<br><br>BMI, men<br><br>BMI, women                                                    | <18.5<br>18.5-22.9<br>23.0-24.9<br>25.0-29.9<br>≥30.0<br><br><18.5<br>18.5-22.9<br>23.0-24.9<br>25.0-29.9<br>≥30.0<br><br><18.5<br>18.5-22.9<br>23.0-24.9<br>25.0-29.9<br>≥30.0 | 1.23 (1.00-1.52)<br>1.00<br>1.15 (1.05-1.27)<br>1.26 (1.16-1.38)<br>2.20 (1.87-2.59)<br>1.17 (0.90-1.53)<br>1.00<br>1.09 (0.97-1.23)<br>1.22 (1.09-1.37)<br>2.17 (1.71-2.75)<br>1.32 (0.95-1.84)<br>1.00<br>1.24 (1.07-1.44)<br>1.30 (1.13-1.50)<br>2.22 (1.77-2.79) | Age, sex, alcohol, exercise frequency, hypertension, diabetes, ischemic heart disease, congestive heart failure, chronic kidney disease, chronic lung disease, malignancy, thyroid disease, fasting glucose, urine protein |
| Lee JJ et al, 2016, USA          | Framingham Heart Study Offspring and Third-Generation                 | 1998-2001 and 2002-2005 - NA, 9.7 years follow-up | 2135 men and women, age : 162 AF cases                 | Measured | Pericardial fat<br>Intrathoracic fat<br>Abdominal visceral fat                                | Per 46 cm <sup>3</sup><br>Per 63 cm <sup>3</sup><br>Per 1061 cm <sup>3</sup>                                                                                                    | 1.13 (0.99-1.30)<br>1.19 (1.01-1.40)<br>1.09 (0.93-1.28)                                                                                                                                                                                                             | Age, sex, SBP, DBP, current smoking, antihypertensive medication use, diabetes mellitus, history of heart failure, history of myocardial infarction                                                                        |

|  |         |  |  |  |  |  |  |  |
|--|---------|--|--|--|--|--|--|--|
|  | Cohorts |  |  |  |  |  |  |  |
|--|---------|--|--|--|--|--|--|--|

AF=atrial fibrillation, BMI=body mass index, CHD=coronary heart disease, CHF=congestive heart failure, COPD=chronic obstructive pulmonary disease,  
 CVD=cardiovascular disease, DBP=diastolic blood pressure, ECG=electrocardiogram, FEV<sub>1</sub>=forced expiratory volume in 1 second, FH=family history,  
 GFR=glomerular filtration rate, HDL=high density lipoprotein, HF=heart failure, HOMA-IR= homeostatic model assessment of insulin resistance, IHD=ischemic heart  
 disease, LDL=low-density lipoprotein, LVH=left ventricular hypertrophy, MH=metabolically health, MI=myocardial infarction, MUH=metabolically unhealthy,  
 NA=not available SBP=systolic blood pressure, WHI=Women’s Health Initiative, WHR= waist-to-hip ratio

Supplementary Table 5. Table of RRs and 95% CIs from nonlinear dose-response analysis of BMI and atrial fibrillation

|      | Atrial fibrillation |
|------|---------------------|
| BMI  | RR (95% CI)         |
| 15.0 | 0.98 (0.90-1.06)    |
| 17.5 | 0.96 (0.93-1.00)    |
| 20.0 | 1.00                |
| 22.5 | 1.09 (1.04-1.13)    |
| 25.0 | 1.21 (1.13-1.31)    |
| 27.5 | 1.39 (1.25-1.56)    |
| 30.0 | 1.63 (1.40-1.89)    |
| 32.5 | 1.93 (1.60-2.32)    |
| 35.0 | 2.32 (1.86-2.90)    |
| 37.5 | 2.82 (2.18-3.66)    |
| 40.0 | 3.45 (2.56-4.64)    |

Supplementary Table 6. Table of RRs and 95% CIs from nonlinear dose-response analysis of waist circumference and atrial fibrillation

| Men   |                  |
|-------|------------------|
| WC    | RR (95% CI)      |
| 76 cm | 1.00             |
| 80    | 1.01 (0.89-1.15) |
| 85    | 1.07 (0.85-1.35) |
| 90    | 1.18 (0.88-1.57) |
| 95    | 1.34 (0.97-1.84) |
| 100   | 1.55 (1.13-2.14) |
| 105   | 1.84 (1.36-2.49) |
| 110   | 2.22 (1.69-2.92) |

Supplementary Table 7. Table of summary relative risks (95% CIs) from the current meta-analysis

| Adiposity variable  | N  | Increment           | Summary RR (95% CI) | I <sup>2</sup> | P <sub>heterogeneity</sub> |
|---------------------|----|---------------------|---------------------|----------------|----------------------------|
| BMI                 | 25 | 5 kg/m <sup>2</sup> | 1.28 (1.20-1.38)    | 97%            | <0.0001                    |
| Waist circumference | 5  | 10 cm               | 1.18 (1.12-1.25)    | 73%            | 0.005                      |
| Waist-to-hip ratio  | 4  | 0.1 units           | 1.09 (1.02-1.16)    | 44%            | 0.15                       |
| Hip circumference   | 3  | 10 cm               | 1.32 (1.16-1.51)    | 91%            | <0.0001                    |
| Weight              | 10 | 5 kg                | 1.10 (1.08-1.13)    | 74%            | <0.0001                    |
| Weight gain         | 2  | 5 kg                | 1.08 (0.97-1.19)    | 86%            | 0.007                      |
| Body fat mass       | 4  | 5 kg                | 1.09 (1.02-1.16)    | 94%            | <0.0001                    |
| Body fat percentage | 3  | 10%                 | 1.10 (0.92-1.33)    | 90%            | <0.0001                    |

Supplementary Figure 1. Funnel plot for BMI and atrial fibrillation incidence

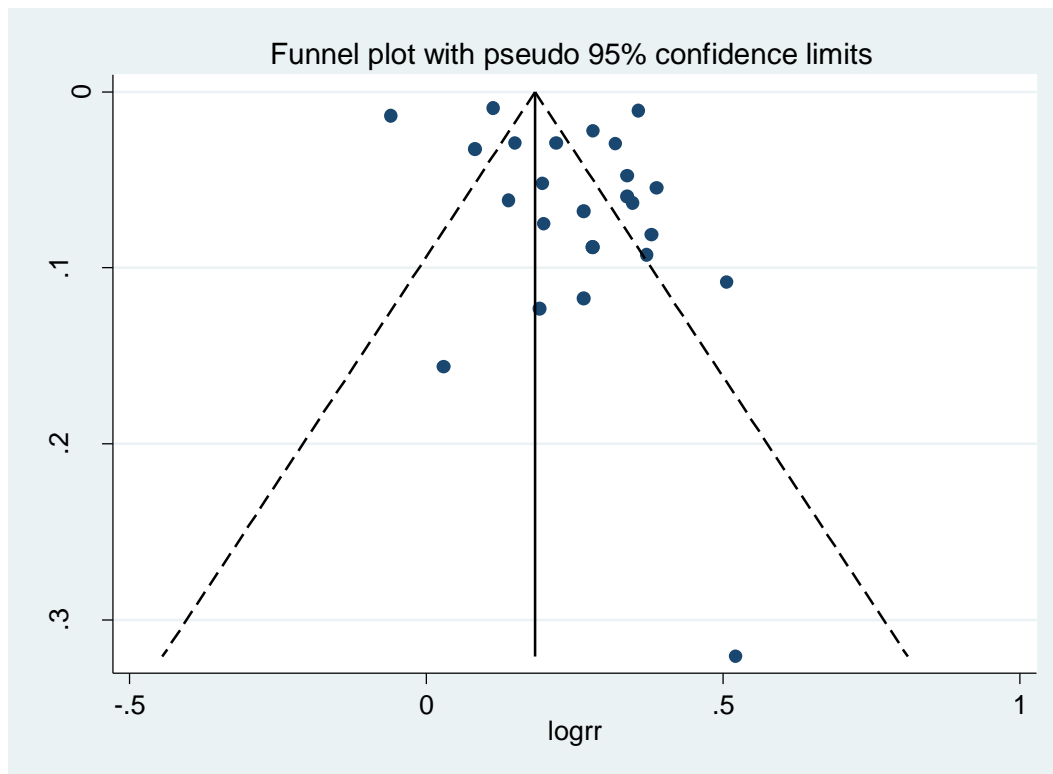

## Moose checklist

| Reporting of background should include                                                                                                     | Page                                                |
|--------------------------------------------------------------------------------------------------------------------------------------------|-----------------------------------------------------|
| Problem definition                                                                                                                         | 3-4                                                 |
| Hypothesis statement                                                                                                                       | 4                                                   |
| Description of study outcome(s)                                                                                                            | 3-4, 5                                              |
| Type of exposure or intervention used                                                                                                      | 3-4, 5                                              |
| Type of study designs used                                                                                                                 | 3-4, 5                                              |
| Study population                                                                                                                           | 5, Supplementary Table 4                            |
| Reporting of search strategy should include                                                                                                |                                                     |
| Qualifications of searchers (eg, librarians and investigators)                                                                             | 5, Investigators                                    |
| Search strategy, including time period included in the synthesis and keywords                                                              | Supplementary Table 1 and 2                         |
| Effort to include all available studies, including contact with authors                                                                    | No contact with authors                             |
| Databases and registries searched                                                                                                          | 5                                                   |
| Search software used, name and version, including special features used (eg, explosion)                                                    | 5, Supplementary Table 1 and 2                      |
| Use of hand searching (eg, reference lists of obtained articles)                                                                           | 5                                                   |
| List of citations located and those excluded, including justification                                                                      | Supplementary Table 3                               |
| Method of addressing articles published in languages other than English                                                                    | 5, only English language publications were included |
| Method of handling abstracts and unpublished studies                                                                                       | 5, not included                                     |
| Description of any contact with authors                                                                                                    | No contact with authors                             |
| Reporting of methods should include                                                                                                        |                                                     |
| Description of relevance or appropriateness of studies assembled for assessing the hypothesis to be tested                                 | 5-6                                                 |
| Rationale for the selection and coding of data (eg, sound clinical principles or convenience)                                              | 5-6                                                 |
| Documentation of how data were classified and coded (eg, multiple raters, blinding, and interrater reliability)                            | 6                                                   |
| Assessment of confounding (eg, comparability of cases and controls in studies where appropriate)                                           | Table 1, Supplementary Table 4                      |
| Assessment of study quality, including blinding of quality assessors; stratification or regression on possible predictors of study results | 5, 11, Table 1                                      |
| Assessment of heterogeneity                                                                                                                | 7                                                   |



|                                                                                                                                                                                                                                                                              |                                                      |
|------------------------------------------------------------------------------------------------------------------------------------------------------------------------------------------------------------------------------------------------------------------------------|------------------------------------------------------|
| Description of statistical methods (eg, complete description of fixed or random effects models, justification of whether the chosen models account for predictors of study results, dose-response models, or cumulative meta-analysis) in sufficient detail to be replicated | 6-7                                                  |
| Provision of appropriate tables and graphics                                                                                                                                                                                                                                 | 8-11, Supplementary Table 1-4                        |
|                                                                                                                                                                                                                                                                              |                                                      |
| Reporting of results should include                                                                                                                                                                                                                                          |                                                      |
| Graphic summarizing individual study estimates and overall estimate                                                                                                                                                                                                          | 8-11, Figure 2-5, Table 1                            |
| Table giving descriptive information for each study included                                                                                                                                                                                                                 | Supplementary Table 4                                |
| Results of sensitivity testing (eg, subgroup analysis)                                                                                                                                                                                                                       | 10-11, Table 1                                       |
| Indication of statistical uncertainty of findings                                                                                                                                                                                                                            | 8-11                                                 |
|                                                                                                                                                                                                                                                                              |                                                      |
| Reporting of discussion should include                                                                                                                                                                                                                                       |                                                      |
| Quantitative assessment of bias (eg, publication bias)                                                                                                                                                                                                                       | 14                                                   |
| Justification for exclusion (eg, exclusion of non-English-language citations)                                                                                                                                                                                                | No relevant non-English publications were identified |
| Assessment of quality of included studies                                                                                                                                                                                                                                    | 15                                                   |
|                                                                                                                                                                                                                                                                              |                                                      |
| Reporting of conclusions should include                                                                                                                                                                                                                                      |                                                      |
| Consideration of alternative explanations for observed results                                                                                                                                                                                                               | 13-14                                                |
| Generalization of the conclusions (ie, appropriate for the data presented and within the domain of the literature review)                                                                                                                                                    | 14-15                                                |
| Guidelines for future research                                                                                                                                                                                                                                               | 15                                                   |
| Disclosure of funding source                                                                                                                                                                                                                                                 | 16                                                   |
